1 RESEARCH ARTICLES

2 **Long Title: 11 $\beta$ -HSD1 inhibition does not affect murine tumour angiogenesis but may exert**  
3 **a selective effect on tumour growth by modulating inflammation and fibrosis**

4 **Short Title: 11 $\beta$ -HSD1 inhibition does not affect murine tumour angiogenesis but may**  
5 **affect tumour growth**

6 Callam T Davidson<sup>1</sup>, Eileen Miller<sup>1</sup>, Morwenna Muir<sup>2</sup>, John C. Dawson<sup>2</sup>, Martin Lee<sup>2</sup>, Stuart  
7 Aitken<sup>3</sup>, Alan Serrels<sup>2</sup>, Scott P Webster<sup>1</sup>, Natalie Z. M. Homer<sup>1,4</sup>, Ruth Andrew<sup>1</sup>, Valerie G.  
8 Brunton<sup>2¶</sup>, Patrick W. F. Hadoke<sup>1\*¶</sup>, Brian R. Walker<sup>1,5¶</sup>

9 <sup>1</sup>BHF Centre for Cardiovascular Science, The Queen's Medical Research Institute, University of  
10 Edinburgh, Edinburgh, UK; <sup>2</sup>Cancer Research UK Edinburgh Centre, Institute of Genetics &  
11 Molecular Medicine, University of Edinburgh, Edinburgh, UK; <sup>3</sup>MRC Human Genetics Unit, MRC  
12 Institute of Genetics and Molecular Medicine, University of Edinburgh, Edinburgh, UK; <sup>4</sup>Edinburgh  
13 Mass Spectrometry Core, Clinical Research Facility, University of Edinburgh, Edinburgh, UK;  
14 <sup>5</sup>Institute of Genetic Medicine, Newcastle University, Newcastle University, Newcastle upon Tyne,  
15 UK. ¶Joint senior authors

16

17 \*Correspondence: Patrick W. F. Hadoke

18 Email: [patrick.hadoke@ed.ac.uk](mailto:patrick.hadoke@ed.ac.uk)

19

20

21

22

23

24

## 25 **Abstract**

26 Glucocorticoids inhibit angiogenesis by activating the glucocorticoid receptor. Inhibition of the  
27 glucocorticoid-activating enzyme 11 $\beta$ -hydroxysteroid dehydrogenase type 1 (11 $\beta$ -HSD1) reduces  
28 tissue-specific glucocorticoid action and promotes angiogenesis in murine models of myocardial  
29 infarction. Angiogenesis is important in the growth of some solid tumours. This study used murine  
30 models of squamous cell carcinoma (SCC) and pancreatic ductal adenocarcinoma (PDAC) to test  
31 the hypothesis that 11 $\beta$ -HSD1 inhibition promotes angiogenesis and subsequent tumour growth.  
32 SCC or PDAC cells were injected into female FVB/N or C57BL6/J mice fed either standard diet,  
33 or diet containing the 11 $\beta$ -HSD1 inhibitor UE2316. SCC tumours grew more rapidly in UE2316-  
34 treated mice, reaching a larger ( $P < 0.01$ ) final volume ( $0.158 \pm 0.037 \text{ cm}^3$ ) than in control mice  
35 ( $0.051 \pm 0.007 \text{ cm}^3$ ). However, PDAC tumour growth was unaffected. Immunofluorescent analysis  
36 of SCC tumours did not show differences in vessel density (CD31/ $\alpha$ -smooth muscle actin) or  
37 cell proliferation (Ki67) after 11 $\beta$ -HSD1 inhibition, and immunohistochemistry of SCC tumours did  
38 not show changes in inflammatory cell (CD3- or F4/80-positive) infiltration. In culture, the  
39 growth/viability (assessed by live cell imaging) of SCC cells was not affected by UE2316 or  
40 corticosterone. Second Harmonic Generation microscopy showed that UE2316 reduced Type I  
41 collagen ( $P < 0.001$ ), whilst RNA-sequencing revealed that multiple factors involved in the innate  
42 immune/inflammatory response were reduced in UE2316-treated SCC tumours.  
43 11 $\beta$ -HSD1 inhibition increases SCC tumour growth, likely via suppression of  
44 inflammatory/immune cell signalling and extracellular matrix deposition, but does not promote  
45 tumour angiogenesis or growth of all solid tumours.

46 **Keywords: glucocorticoids, angiogenesis, cancer, collagen, inflammation, pancreatic**  
47 **ductal adenocarcinoma, squamous cell carcinoma, 11 $\beta$ -HSD1.**

## 48 **Introduction**

49 Glucocorticoids are vital modulators of the physiological stress response, exerting myriad effects  
50 across a range of tissues [1]. Their potent anti-inflammatory and immunosuppressive effects have

51 also been exploited clinically for more than half a century; synthetic glucocorticoids are commonly  
52 used to treat chronic inflammatory conditions such as rheumatoid arthritis, to suppress the  
53 immune system before organ transplant, and in the treatment of leukemia [2].

54 The adverse consequences of chronic glucocorticoid excess are exemplified in people with  
55 Cushing's syndrome, who develop increased central adiposity, dyslipidemia, muscle wasting, loss  
56 of memory, hyperglycaemia and insulin resistance [1]. Reducing glucocorticoid action in key  
57 target tissues, such as liver, adipose and brain, may therefore be clinically desirable, but targeting  
58 the hypothalamic-pituitary-adrenal (HPA) axis risks compromising the systemic coordination of  
59 the stress response.

60 Glucocorticoids are subject to tissue-specific pre-receptor regulation by the 11 $\beta$ -hydroxysteroid  
61 (11 $\beta$ -HSD) isozymes; 11 $\beta$ -HSD2 converts cortisol or corticosterone to inert 11-keto metabolites  
62 (cortisone or 11-dehydrocorticosterone, respectively) to allow selective access of aldosterone to  
63 mineralocorticoid receptors (MR), while 11 $\beta$ -HSD1 re-activates glucocorticoids by catalyzing the  
64 reverse reductase reaction in target tissues [3], including liver, adipose, brain and the blood  
65 vessel wall [4]. Targeting 11 $\beta$ -HSD1 therefore offers a novel therapeutic avenue to reduce  
66 glucocorticoid action. Clinical trials of 11 $\beta$ -HSD1 inhibitors have shown moderate improvements  
67 in glycaemic control in patients with type II diabetes [5], and more recently have shown promise in  
68 the treatment of cognitive decline [6].

69 Glucocorticoids also exert potent angiostatic effects, an activity first shown over 30 years ago but  
70 the mechanism of which remains uncertain [7]. Inhibition or deletion of 11 $\beta$ -HSD1 promotes  
71 angiogenesis *in vitro* and *in vivo*, enhancing wound healing, reducing intra-adipose hypoxia and,  
72 most strikingly, enhancing recovery after myocardial infarction in mice [8-12]. Whilst presenting a  
73 potential clinical opportunity, these findings have also raised concerns that 11 $\beta$ -HSD1 inhibitors  
74 could exacerbate conditions characterised by pathological angiogenesis, such as proliferative  
75 diabetic retinopathy and solid tumour growth [15]. Whereas 11 $\beta$ -HSD1 inhibition or deletion was  
76 recently shown not to promote angiogenesis in a model of proliferative retinopathy [13], there is  
77 evidence to suggest it could influence tumour growth [14]. Moreover, not only might 11 $\beta$ -HSD1  
78 inhibitors act in vascular cells to promote tumour angiogenesis, but they might also directly

79 influence tumour cells as well as other cells in the tumour microenvironment, including fibroblasts,  
80 and tumour-associated immune cells [38].

81 The only study to address this topic thus far demonstrated that overexpression of 11 $\beta$ -HSD1 in  
82 hepatocellular carcinoma cells reduced tumour growth and angiogenesis [14]. No study has yet  
83 examined the effects of 11 $\beta$ -HSD1 inhibition on tumour growth. Of note, expression of 11 $\beta$ -HSD1  
84 and the glucocorticoid receptor (GR) are particularly high in squamous cell carcinoma (SCC) [16],  
85 highlighting this tumour type as potentially glucocorticoid-sensitive. The present study tested the  
86 hypothesis that 11 $\beta$ -HSD1 inhibition promotes the growth of subcutaneously-implanted SCC and  
87 pancreatic ductal adenocarcinoma (PDAC) tumours in mice, as a result of increased tumour  
88 angiogenesis.

## 89 **Material and Methods**

### 90 **Animals**

91 In total, 18 C57BL6/J and 18 FVB/N mice were purchased from Envigo (Blackthorn, UK) or  
92 Charles River (Elphinstone, UK), respectively. All experimental animals were female and aged 9-  
93 14 weeks and sacrificed by cervical dislocation. Groups were age-matched. All procedures were  
94 approved by the institutional ethical committee and carried out by a licensed individual and in  
95 strict accordance with the Animals (Scientific Procedures) Act 1986 and the EU Directive 2010/63  
96 and under project licence 70/8897 or 60/4523.

### 97 **Cell culture**

98 Studies made use of two immortalised murine cancer cell lines. SCC cells [17] were generated in-  
99 house by Dr Alan Serrels using a two-stage 7,12-Dimethylbenz[a]anthracene (DMBA)/TPA  
100 chemical carcinogenesis protocol [18]. A PDAC cell line, Panc043, was provided by the Beatson  
101 Institute in Glasgow; these cells were originally derived from tumours developed using the *LSL-*  
102 *KrasG12D/+;LSL-Trp53R172H/+;Pdx-1-Cre* (KPC) model [19]. Panc-043 cells were cultured in

103 Dulbecco's Modified Eagle Medium (DMEM) supplemented with 10% FCS. SCC cells were  
104 maintained in Glasgow Minimum Essential Medium (GMEM) supplemented with 10% FCS, 2mM  
105 L-Glutamine, 1mM sodium pyruvate, MEM non-essential amino acids (Thermo-Fisher) and MEM  
106 vitamins.

107 Tumour cells (SCC or Panc043) were cultured in 96-well plates (Bio-Greiner; 5000 cells per well)  
108 and treated with 25-300nM UE2316 or corticosterone. Plates were imaged and confluence  
109 determined using the Incucyte ZOOM Live-cell analysis system (over 72 hours; Essen  
110 BioScience). An alamarBlue assay (Thermo-Fisher) was also performed as per manufacturer's  
111 instructions to provide a secondary measure of viable cell number.

## 112 **Drugs and Corticosteroids**

113 The 11 $\beta$ -HSD1 inhibitor UE2316 ([4-(2-chlorophenyl-4-fluoro-1-piperidinyl)][5-(1H-pyrazol-4-yl)-3-  
114 thienyl]-methanone) was synthesised by High Force Ltd (Durham, UK) [20]. For *in vivo* studies,  
115 UE2316 was delivered *ad libitum* to animals added to a RM1 diet (175mg/kg UE2316) prepared  
116 by Special Diet Services (Essex, UK). 11-Dehydrocorticosterone and corticosterone were from  
117 Steraloids (Newport, USA). Tritiated steroids ([1,2,6,7]-<sup>3</sup>H<sub>4</sub>-corticosterone and [1,2,6,7]-<sup>3</sup>H<sub>4</sub>-  
118 cortisone) were from PerkinElmer (Wokingham, UK).

## 119 **Tumour Model**

120 *In vivo* studies used an established model of subcutaneous tumour development [21]. SCC or  
121 PDAC cells were injected subcutaneously (1x10<sup>6</sup> cells/flank) into FVB/N or C57BL6/J mice,  
122 respectively, fed either control or UE2316 diet for 5 days in advance of injection and throughout  
123 the remainder of the experiment (N=6-9/group). Diet was weighed regularly to monitor  
124 consumption, which did not differ between diets. SCC tumours were grown for 11 days, PDAC  
125 tumours were grown for 14 days, and both were measured using calipers every 2-3 days. Tumour  
126 volume was calculated as the volume of an ellipsoid (0.5\*length\*breadth<sup>2</sup>). Mice were culled by  
127 cervical dislocation.

## 128 **Histology**

### 129 **Vessel staining**

130 Paraffin-embedded tumour sections underwent rehydration and heat-based antigen retrieval.  
131 Sections were permeabilised (0.4% Triton-X, 15 min) and blocked (1% normal goat serum, 30  
132 min; Biosera, Nuaille, France), incubated with primary CD31 antibody (1/300 dilution, 18h, 4°C,  
133 Ab28364; Abcam, Cambridge, UK), rinsed with PBS and incubated with secondary antibody and  
134 primary conjugated  $\alpha$ -smooth muscle actin antibody (1/1000 dilution, 1 hour, room temperature,  
135 A-11034; Molecular Probes, Eugene, USA. C6198; Sigma) before counterstaining with DAPI (5  
136 min) and mounting using Fluoromount G (SouthernBiotech, Cambridge, UK). Slides were imaged  
137 with an Axioscan.Z1 (Zeiss) digital slide scanner. Higher magnification images were obtained  
138 using a LSM710 confocal microscope (Zeiss). Vessels were manually counted by a blinded  
139 observer across 10 randomly selected 0.1mm<sup>2</sup> fields of view, from two tumour sections spaced 50  
140  $\mu$ m apart. CD31-positive/ $\alpha$ -SMA-negative vessels and CD31/ $\alpha$ -SMA-positive vessels were both  
141 quantified to allow the ratio of vessels with smooth muscle coverage to be calculated. As a  
142 secondary measure of vessel density, sections stained for CD31 were quantified by Chalkley  
143 count, as described [22]. One section (three hotspots) was quantified per tumour.

### 144 ***In vivo* tumour cell proliferation**

145 Tumour sections were stained with Ki67 antibody (proliferation marker, 1/100 dilution, Ab155580;  
146 Abcam) as above. 2 sections/tumour were scanned at 200x magnification, the most proliferative  
147 region selected by eye, and this region then imaged at 400x magnification. Ki67-positive cells  
148 were then quantified manually per hotspot.

### 149 **Immune/inflammatory cell staining**

150 F4/80 (1/300, 14-4801; eBiosciences) and CD3 (1/100, Sc-20047; Santa-Cruz) staining were  
151 performed using the Leica BOND-III automated staining system and the Leica refine detection kit

152 as per manufacturer's instructions (Leica). Trypsin-based antigen retrieval was used for F4/80  
153 staining, and heat-based antigen retrieval for CD3 staining. Dehydrated sections were mounted  
154 with DPX and imaged using the slide scanner. Images were segmented and stain percentage  
155 area was quantified automatically using ImageJ software.

## 156 **Enzyme activity assays**

157 A BioRad protein DC assay (BioRad, Hemel-Hempsted, UK) was performed as per  
158 manufacturer's instructions.

## 159 **Dehydrogenase activity assay**

160 Homogenized tumour samples were diluted in assay buffer (63g glycerol, 8.77g NaCl, 186mg  
161 ethylenediaminetetraacetic acid (EDTA), 3.03g Tris, made up to 500mL with distilled H<sub>2</sub>O and pH  
162 adjusted to 7.7). <sup>3</sup>H<sub>4</sub>-Corticosterone (250nM) and NADP<sup>+</sup> (2mM; Cambridge Bioscience) were  
163 added before incubation in a shaking water bath (37°C). After incubation, samples were extracted  
164 with ethyl acetate (10:1), dried under nitrogen and dissolved in 65:15:25  
165 water/acetonitrile/methanol.

## 166 **Reductase activity assay**

167 C57BL6/J mouse liver was excised and sectioned. Liver pieces (5-20mg, N=6/group) were  
168 cultured in 1mL DMEM-F12 medium containing 12.5nM <sup>3</sup>H<sub>4</sub>-cortisone and 1μM cold cortisone  
169 with either 300nM UE2316 or vehicle (final DMSO concentration 0.3%). Plates were incubated for  
170 24 hours (5% CO<sub>2</sub>, 37°C). Media was extracted on Sep-Pak C-18 (360mg) cartridges (Waters,  
171 Elstree, UK), dried under nitrogen, resuspended in 200μL HPLC-grade H<sub>2</sub>O added, and extracted  
172 with ethyl acetate (10:1) to remove phenol red contamination, dried under nitrogen and dissolved  
173 in 60:40 water/methanol.

## 174 **Second Harmonic Generation Imaging**

175 Type I collagen was visualized in SCC and PDAC tumours (N=6/group) by Second Harmonic  
176 Generation (SHG) microscopy. A pump laser (tuned to 816.8 nm, 7 ps, 80 MHz repetition rate; 50  
177 mW power at the objective) and a spatially overlapped second beam, termed the Stokes laser  
178 (1064 nm, 5–6 ps, 80 MHz repetition rate, 30 mW power at the objective; picoEmerald (APE)  
179 laser) was inserted into an Olympus FV1000 microscope coupled with an Olympus  
180 XLPL25XWMP N.A. 1.05 objective lens with a short-pass 690 nm dichroic mirror (Olympus). The  
181 Second Harmonic Generation signal was filtered (FF552-Di02, FF483/639-Di01 and FF420/40)  
182 and images quantified using Image J.

## 183 **qPCR**

184 Frozen tissue was homogenized in Qiazol reagent (Qiagen), allowed to settle at room  
185 temperature for 5 min, vortexed in chloroform and left to settle for 2 min before centrifugation  
186 (12000 RCF x 15 min at 4°C). The resultant aqueous phase was mixed with an equal volume of  
187 70% ethanol. All subsequent on-column steps were performed as per the RNeasy manufacturer's  
188 protocol. RNA concentration and integrity were assessed using the Nanodrop 1000 (Thermo-  
189 Fisher Scientific). cDNA was generated from RNA using the QuantiTect Reverse Transcription Kit  
190 (Qiagen) as per manufacturer's protocol. For the PCR reaction, samples were incubated at 42°  
191 for 15 min followed by 95° for 3 min in a Thermal cycler (Techne-Cole-Palmer, Staffordshire, UK).  
192 cDNA was diluted 1/40 in RNase-free water and a standard curve constructed by serial dilution of  
193 a pooled sample. In triplicate on a 384-well plate, 2µL of sample were combined with 5µL of  
194 Lightcycler 480 Probes Master mastermix (Roche), primers (0.1µL/sample Forward and Reverse),  
195 probe (0.1µL/sample) and RNase-free water to make up to 10µL total volume. Plates were spun  
196 (420 RCF x 2 min on LCM-3000 plate centrifuge (Grant Instruments, Royston, UK) before  
197 analysis on the Light Cycler 480 (Roche). Samples were run for 50 cycles (10s at 95°C and 30s  
198 at 60°C). All data were normalised to the average of two housekeeping genes (*Gapdh* and *Tbp*).



## 199 **RNA sequencing**

200 RNA from SCC tumours, extracted as described above, was sequenced by GATC Biotech  
201 (Constance, Germany). Raw data were processed using Tophat2 [23], which was used to map  
202 reads to the mouse mm10 reference genome. Differential gene expression was analysed using  
203 Cuffdiff [24]. DEseq2 was used to perform a Principle Component Analysis (PCA) to assess  
204 variance between samples. Gene ontology analysis was performed using the Database for  
205 Annotation, Visualization and Integrated Discovery (DAVID) v6.8.

## 206 **Data analysis and statistics**

207 All statistics were performed using Prism software v6/7 (Graphpad). Data are presented as mean  
208  $\pm$  S.E. Outliers were identified using Grubbs' test and excluded appropriately. All data sets were  
209 tested for a parametric distribution and transformed/analysed appropriately. N refers to the  
210 number of animals per group in an experiment, with the exception of cell culture studies in which  
211 N refers to biological repeats on separate days using the same cell line.  $P < 0.05$  was considered  
212 significant.

## 213 **Results**

### 214 **11 $\beta$ -HSD1 is expressed in SCC but not PDAC tumour cell lines**

215 When comparing 11 $\beta$ -HSD1 dehydrogenase activity between tumour types, SCC tumours  
216 showed a considerably higher rate of product formation than PDAC (Fig. 1A) and showed higher  
217 GR expression (Fig. 1B). 11 $\beta$ -HSD2 was not detected in either tumour type.

218

### 219 **11 $\beta$ -HSD1 inhibition enhances SCC tumour growth**

220 UE2316 accelerated the growth of SCC tumours from day 4 onwards (Fig. 2A) but had no effect  
221 on the growth of PDAC tumours (Fig. 2B). UE2316 and control diet fed groups consumed similar

222 quantities of diet and did not differ in weight throughout the experiment (Fig. 2C). The estimated  
223 dosage achieved in the present studies (based on diet consumed per cage per 2-3 days) was 25-  
224 30mg/kg/mouse/day. Ki67 staining revealed a trend towards reduced tumour cell proliferation in  
225 UE2316-treated SCC tumours compared to control tumours, but this did not reach significance  
226 (Fig. 2D-F).

227

## 228 **11 $\beta$ -HSD1 inhibition does not promote angiogenesis in** 229 **SCC tumours**

230 The effect of 11 $\beta$ -HSD1 inhibition on vessels in tumours was assessed by CD31/ $\alpha$ -SMA-positive  
231 staining (Fig. 3A and B). In SCC and PDAC tumours, UE2316 did not affect the number of blood  
232 vessels per field of view (Fig. 3C) or the vessel number determined by Chalkley counts (Fig. 3E).  
233 In SCC tumours, UE2316 did not affect the proportion of immature vessels lacking smooth  
234 muscle coverage, assessed by CD31 staining in the absence of  $\alpha$ -SMA staining (Fig. 3D).  
235 UE2316 also did not affect mRNA levels for angiogenic factors *Vegfa* and *Vegfr2* in either tumour  
236 type (Fig. 3F).

237

238

## 239 **Neither corticosterone nor UE2316 affect SCC cell** 240 **proliferation *in vitro***

241 SCC cells in culture were imaged using the Incucyte ZOOM live cell imaging system to  
242 investigate the effects of glucocorticoids and UE2316 on cell growth and morphology. Addition of  
243 increasing concentrations of corticosterone (Fig. 4A) or UE2316 (Fig. 4B) had no effect on the  
244 growth of SCC cells over 72 hours. Neither corticosterone (Fig. 4C) nor UE2316 (Fig. 4D)  
245 affected cell viability at any concentration, assessed after 72 hours using an alamarBlue assay.

246

247

## 248 **11 $\beta$ -HSD1 inhibition does not alter F4/80- or CD3-**

## 249 **positive cell infiltration into SCC tumours**

250 To quantify inflammatory cell content, sections from SCC tumours from control (Fig. 5A) and  
251 UE2316-diet-fed mice (Fig. 5B; N=6/group) were labelled with F4/80 antibody, a macrophage  
252 marker. The antibody produced a cytoplasmic stain, present across the tumour but concentrated  
253 at the tumour periphery and in regions near the centre of the tumour. There was no significant  
254 difference in F4/80-positive area in tumours from RM-1 and UE2316 diet-fed mice, despite a  
255 trend towards a decrease in UE2316-treated tumours (Fig. 5C). To quantify infiltrating T-cells,  
256 SCC tumours from control and UE2316-diet-fed mice (N=5/group) were labelled with anti-CD3 to  
257 identify CD3-positive cells. There was no significant difference in CD3-positive area in tumours  
258 from RM-1 and UE2316 diet-fed mice (Fig. 5D); representative images are shown in Figure 5E/F.

259

260

## 261 **11 $\beta$ -HSD1 inhibition reduces type 1 collagen deposition**

## 262 **in SCC tumours**

263 To determine whether tumour collagen deposition was altered by 11 $\beta$ -HSD1 inhibition, Second  
264 Harmonic Generation (SHG) microscopy was performed on SCC tumours (N=6/group; Fig. 6A  
265 and B). Automatic quantification of % collagen area from SHG images revealed a reduced  
266 amount of type I collagen in tumours from mice fed UE2316-diet compared to tumours from mice  
267 fed normal diet (Fig. 6C). This difference was also apparent at a transcriptional level (Fig. 6D).

268

269

270 **11 $\beta$ -HSD1 inhibition influences immune and**  
271 **inflammatory signaling in SCC tumours**

272 Genes found to be differentially expressed (DE) between control and UE2316-treated SCC  
273 tumours by RNA sequencing were analysed using the Database for Annotation, Visualization and  
274 Integrated Discovery (DAVID) v6.8. 674 genes were found to be differentially regulated between  
275 treatment groups. Significantly relevant ( $P < 0.05$ ) biological processes are listed in Table 1. Given  
276 the importance of local glucocorticoids in regulating inflammation, and the chronic inflammatory  
277 state of the tumour microenvironment, genes associated with the inflammatory response and  
278 immune response (6.1% and 4.1% of DE genes respectively, as identified by DAVID) and their  
279 relative expression in UE2316-treated tumours (as identified by RNA-seq) are shown in Figures  
280 7A and B. mRNA coding for a large number of pro-inflammatory cytokines were reduced after  
281 UE2316 treatment, while mRNA for cytokine receptors, toll-like receptor and mast cell protease  
282 transcript was increased.

283

284 **Table 1.**

| Process                                   | q-value |
|-------------------------------------------|---------|
| Inflammatory response                     | 3E-08   |
| Cellular response to interferon-beta      | 4E-07   |
| Positive regulation of gene expression    | 3E-04   |
| Immune response                           | 6E-04   |
| Response to lipopolysaccharide            | 0.001   |
| Positive regulation of cell migration     | 0.001   |
| Chemokine-mediated signalling pathway     | 0.004   |
| Cellular response to interferon- $\gamma$ | 0.004   |

|                                                   |       |
|---------------------------------------------------|-------|
| Negative regulation of osteoblast differentiation | 0.003 |
| Chemotaxis                                        | 0.008 |
| Collagen fibril organization                      | 0.008 |
| Defence response to virus                         | 0.007 |
| Positive regulation of apoptotic process          | 0.008 |
| Circadian rhythm                                  | 0.009 |
| Osteoblast differentiation                        | 0.01  |
| Negative regulation of cell migration             | 0.03  |
| Cell adhesion                                     | 0.04  |
| Ossification                                      | 0.04  |
| Immune system process                             | 0.05  |
| Positive regulation of osteoblast differentiation | 0.05  |
| Defense response to protozoan                     | 0.05  |

285 Gene ontology analysis of RNA-seq data demonstrates the importance of immune and  
286 inflammatory responses in the effects of UE2316. Gene Ontology (GO) analysis was performed  
287 using the Database for Annotation, Visualization and Integrated Discovery (DAVID) v6.8.  
288 Significance is expressed using the p-value corrected for multiple hypothesis testing using the  
289 Benjamini-Hochberg method (q-value). The listed biological processes had  $q < 0.05$ .

290

## 291 Discussion

292 The data generated in this investigation demonstrate that 11 $\beta$ -HSD1 inhibition can promote SCC  
293 tumour growth in mice. This effect was not seen in PDAC tumours, which expressed lower levels  
294 of both GR and 11 $\beta$ -HSD1 than SCC. The present findings are in agreement with other studies

295 that report SCC express particularly high levels of GR [25-26], suggesting that SCC may be a  
296 more glucocorticoid-sensitive tumour type than PDAC. 11 $\beta$ -HSD1 inhibition did not alter vessel  
297 density or *in vitro* tumour cell proliferation, but immune and inflammatory signalling pathways  
298 were altered at the transcriptomic level, as was 11 $\beta$ -HSD1 itself. Immune and inflammatory cell  
299 content did not differ between control and UE2316-treated SCC tumours, suggesting perhaps that  
300 cell behaviour (cytokine environment/activation state) is altered by UE2316. Fluorescence-  
301 Associated Cell Sorting of tumours would be required to more elegantly investigate this question  
302 in future studies. Generation of Type 1 collagen was reduced at both the transcriptomic and  
303 protein level in UE2316-treated SCC tumours; whether this change relates to the altered  
304 inflammatory environment remains uncertain.

305 The only previous study to directly manipulate 11 $\beta$ -HSD1 expression in a solid tumour model  
306 demonstrated that 11 $\beta$ -HSD1 overexpression reduced the growth of hepatocellular carcinoma  
307 (HCC) tumours in Balb/C nude mice [14], an effect which was apparent over a similar time course  
308 as the effect of 11 $\beta$ -HSD1 inhibition shown here (i.e. 3-5 days after cell injection). While the  
309 present study supports a role for 11 $\beta$ -HSD1 and local glucocorticoid metabolism in regulating  
310 tumour growth from an early stage, a different mechanism may be responsible; the study in HCC  
311 identified a significant reduction in tumour angiogenesis, attributed to reduced glycolysis, in  
312 tumours overexpressing 11 $\beta$ -HSD1 compared to controls. No evidence of such a process was  
313 seen in SCC tumours. The present study made use of a murine tumour cell line able to grow in  
314 mice with a functional immune system, a significant strength given that 11 $\beta$ -HSD1 deletion  
315 reduces T-cell infiltration in some inflammatory models [27-29] and is likely to influence the  
316 tumour microenvironment [30]. Interestingly, both tumour types used in these separate studies  
317 (SCC and HCC) were derived from tissues in which 11 $\beta$ -HSD1 is known to play a regulatory role  
318 (skin and liver) [31-35].

319 However, the present study found no evidence of enhanced angiogenesis after 11 $\beta$ -HSD1  
320 inhibition. Enhanced angiogenesis and recovery post-myocardial infarction have been  
321 demonstrated consistently in 11 $\beta$ -HSD1 knockout mice [8, 9, 11-12) and following exposure to  
322 the 11 $\beta$ -HSD1 inhibitor UE2316 [36]. The reparative response to myocardial infarction is

323 characterised by increased neutrophil and macrophage recruitment into the myocardium after  
324 11 $\beta$ -HSD1 inhibition [9, 12], an effect absent in SCC tumours. Angiogenesis after induced  
325 myocardial infarction in rodents is a beneficial process and distinct from the aberrant non-  
326 resolving hypoxia-driven angiogenesis seen in tumours [37], which may be mediated by different  
327 mechanisms and explain the context-specific effects of 11 $\beta$ -HSD1 inhibition.

328 Given the lack of evidence that exaggerated angiogenesis promotes SCC tumour growth  
329 following 11 $\beta$ -HSD1 inhibition, we considered other mechanisms. The absence of a  
330 glucocorticoid-mediated effect on SCC cell proliferation, or any direct effect of UE2316 *in vitro*,  
331 strongly suggests that direct proliferative effects on tumour cells are not relevant. However, based  
332 on the gene ontology analysis of SCC tumours, the immune and inflammatory responses are  
333 likely to be of mechanistic importance. SCC tumours from UE2316-treated mice showed reduced  
334 expression of a range of pro-inflammatory cytokine and chemokine genes. These changes were  
335 accompanied by an increase in the expression of several members of the *Tlr* and *Tnfrsf* families,  
336 and *Csf1r*, suggesting reduced pro-inflammatory ligand binding. Furthermore, expression of a  
337 number of interferon- $\gamma$  (IFN- $\gamma$ ) inducible genes was reduced in tumours from UE2316-treated  
338 animals. As TLR activation can stimulate the production of IFNs, interleukins and TNF by myeloid  
339 and lymphoid cells [38], the evidence points towards reduced inflammatory and immune cell  
340 signalling within tumours from UE2316-treated mice. The reduced expression of *Ccl* and *Cxcl*  
341 chemokines would predict reduced migration of eosinophils, neutrophils and T-cells into tumours,  
342 whilst the reduced expression of 11 $\beta$ -HSD1 itself after UE2316 treatment is indicative of reduced  
343 immune/inflammatory cell infiltration and activation as the enzyme is expressed in macrophages  
344 and lymphocytes and upregulated by immune cell activation [3].

345 The role of inflammation in tumour progression is controversial in that it can both promote tumour  
346 progression (including via stimulation of angiogenesis) and inhibit tumour progression (via anti-  
347 tumour immunosurveillance). In the present model, 11 $\beta$ -HSD1 inhibition appears to decrease  
348 inflammatory signalling whilst enhancing tumour growth, raising the intriguing possibility that  
349 UE2316 dampens the anti-tumour immune response. This requires confirmation at the cellular  
350 level.

351 11 $\beta$ -HSD1 inhibition has been shown to influence inflammation previously, but its effects are  
352 context-dependent and may vary between acute or chronic inflammation. Similar to induced  
353 myocardial infarction, 11 $\beta$ -HSD1 deficiency increases acute inflammation in models of arthritis,  
354 peritonitis and pleurisy [39-40]. In obese adipose tissue and atherosclerotic plaques from 11 $\beta$ -  
355 HSD1 deficient animals, however, inflammatory and immune cell infiltration is attenuated [27, 29].  
356 Arguably, the chronic, non-resolving inflammation and hypoxia seen in obese adipose tissue and  
357 atheroma are more similar to the tumour microenvironment than to the ischaemic myocardium;  
358 thus mechanistically the latter models may be more relevant.

359 There is analogous evidence from other models that 11 $\beta$ -HSD1 influences the same inflammatory  
360 pathways as we observed here. Wamil *et al.* [27] reported that 11 $\beta$ -HSD1 deletion reduces similar  
361 cytokines (including members of the CCL, CXCL and TNF families) in adipose tissue from high-  
362 fat diet-fed mice, associated with decreased CD8+ T-cell infiltration and macrophage infiltration in  
363 adipose tissue. Michailidou *et al.* [10] found decreased fibrosis in adipose tissue from 11 $\beta$ -HSD1  
364 knockout animals. Furthermore, 11 $\beta$ -HSD1 deletion reduces macrophage and T-cell infiltration  
365 into atherosclerotic plaques [29]. Several of the key gene expression changes seen in the present  
366 study have also been seen in atherosclerotic plaques after 11 $\beta$ -HSD1 inhibition [28], including  
367 reductions in interleukins, toll-like receptors, STAT family members, and several chemokines. The  
368 selective 11 $\beta$ -HSD1 inhibitor BVT-2733 was previously shown to improve symptoms of collagen-  
369 induced arthritis by reducing the expression of pro-inflammatory cytokines, including TNF, IL-1 $\beta$   
370 and IL6, and reducing inflammatory cell infiltration into joints [49]. Furthermore, the beneficial  
371 effects of 11 $\beta$ -HSD1 inhibition in the synovium have been linked to reduced glucocorticoid action  
372 in synovial fibroblasts and osteoclasts resulting in a net reduction in damaging inflammation [50].

373 Although we found effects of 11 $\beta$ -HSD1 inhibition on transcripts in SCC tumours, these were not  
374 reflected in demonstrable differences in cell content. Staining for the T cell marker CD3 did not  
375 identify a difference between SCC tumours from control and UE2316-treated mice. Likewise,  
376 F4/80 staining did not reveal a marked difference in macrophage numbers between treatment  
377 groups, yet key transcripts for markers of macrophage polarisation were altered in whole tumour



378 homogenates, suggesting a more subtle effect of 11 $\beta$ -HSD1 inhibition on macrophage content or  
379 polarisation.

380 Cancer-associated fibroblasts and extracellular matrix (ECM) deposition can also influence  
381 tumour progression [41-43]. The reduced type 1 collagen seen in SCC tumours mirrors the  
382 reduced fibrosis in obese adipose tissue from 11 $\beta$ -HSD1 deficient mice [15], which also showed  
383 decreased alpha-smooth muscle actin expression, suggesting reduced fibroblast numbers.  
384 Reduced fibrosis and reduced expression of *Col1a1*, *Col1a2*, *Col14a1*, stromal-cell derived factor  
385 1 (*Sdf1*) and *Lox* are all suggestive of reduced fibroblast activity [41-42]. Since fibroblasts can  
386 promote anti-tumour immune cell infiltration into tumours [41, 43], suppression of fibroblasts by  
387 UE2316 could explain the potentially dampened anti-tumour immune response in SCC tumours.  
388 Conversely, inflammatory cells are also able to recruit fibroblasts into SCC tumours [44] and this  
389 enhanced recruitment can promote SCC growth suppression via the deposition of a fibrotic ECM  
390 that constrains tumour cell proliferation and invasiveness [45-46], so the effect of UE2316 could  
391 be primarily on inflammatory cells or on tumour cells releasing pro-inflammatory signals, with  
392 secondary effects on fibroblasts.

393 Given that only one of the two tumour types examined responded to UE2316 treatment,  
394 predicting which tumour types may be more at risk will be important if 11 $\beta$ -HSD1 inhibitors are to  
395 be used in at-risk patients. Review of cancer genomics data sets available via the cBioPortal for  
396 Cancer Genomics [51] reveals amplification of *HSD11B1* expression in 8-10% of breast and  
397 hepatobiliary cancer studies, while around 8% of cutaneous melanomas show either mutation  
398 (4%) or amplification (4%) of the gene. Altered expression of *HSD11B1* is also apparent in  
399 around 5% of studies on endometrial cancers, non-Hodgkin lymphomas, non-small cell lung  
400 cancers and melanomas. Extra vigilance is recommended if 11 $\beta$ -HSD1 use is indicated in  
401 patients with such *HSD11B1*-expressing tumours.

402 In summary, inhibition of 11 $\beta$ -HSD1 in SCC tumours does not alter tumour angiogenesis but  
403 dampens immune and inflammatory signalling within the tumour microenvironment, possibly  
404 leading to the reduced activation of cancer associated fibroblasts and the reduced deposition of

405 type I collagen. These factors, in combination, may promote SCC growth in this model but  
406 relevance to other tumours is uncertain.

## 407 **Acknowledgments**

408 *CTD, EM, MM, JCD, ML and SA designed and conducted experimental work; AS, SPW, NZMH,*  
409 *and RA provided tools and supervised specialised analyses; VGB, PWFH and BRW supervised*  
410 *CDT in experimental design, analysis and interpretation and in the preparation of the manuscript.*  
411 *All authors reviewed the final manuscript. Thea authors are grateful to Marisa Magennis for*  
412 *administrative support. Our work is supported by the British Heart Foundation and The Wellcome*  
413 *Trust.*

414

415

416

## 417 **References**

- 418 1. Walker, BR. Glucocorticoids and Cardiovascular Disease. *European Journal of*  
419 *Endocrinology.* 2007;157(5):545-559.
- 420 2. Coutinho, AE and Chapman, KE. The anti-inflammatory and immunosuppressive effects  
421 of glucocorticoids, recent developments and mechanistic insights. *Molecular and Cellular*  
422 *Endocrinology.* 2011;335(1):2-13.
- 423 3. Chapman, KE, Holmes, M and Seckl, J. 11 $\beta$ -hydroxysteroid dehydrogenases:  
424 intracellular gate-keepers of tissue glucocorticoid action. *Physiological Reviews.*  
425 2013;93(3):1139-1206.
- 426 4. Seckl, JR and Walker, BR. Minireview: 11 $\beta$ -Hydroxysteroid Dehydrogenase Type 1— A  
427 Tissue-Specific Amplifier of Glucocorticoid Action 1, *Endocrinology.* 2001;142(4):1371–

- 428           1376.
- 429           5. Anderson, A and Walker, BR. 11 $\beta$ -HSD1 Inhibitors for the Treatment of Type 2 Diabetes  
430           and Cardiovascular Disease. *Drugs*. 2013;73(13):1385-1393.
- 431           6. Webster, SP, McBride A, Binnie, M, Sooy, K, Seckl, JR, Andrew, R et al. Selection and  
432           early clinical evaluation of the brain-penetrant 11 $\beta$ -hydroxysteroid dehydrogenase type 1  
433           (11 $\beta$ -HSD1) inhibitor UE2343 (Xanamem<sup>TM</sup>). *British Journal of Pharmacology*.  
434           2017;174(5):396-408.
- 435           7. Folkman, J, Langer, R, Linhardt, R, Haudenschild, C and Taylor, S. Angiogenesis  
436           inhibition and tumor regression caused by heparin or a heparin fragment in the presence  
437           of cortisone. *Science*. 1983;221(4612):719-725.
- 438           8. Small, GR, Hadoke, PWF, Sharif, I, Dover, AR, Armour, D, Kenyon, CJ et al. Preventing  
439           local regeneration of glucocorticoids by 11beta-hydroxysteroid dehydrogenase type 1  
440           enhances angiogenesis. *Proceedings of the National Academy of Sciences of the United*  
441           *States of America*. 2005;102(34):12165–12170.
- 442           9. McSweeney, SJ, Hadoke, PWF, Kozak, AM, Small, GR, Khaled, H, Walker, BR et al.  
443           Improved heart function follows enhanced inflammatory cell recruitment and  
444           angiogenesis in 11 $\beta$ -HSD1-deficient mice post-MI. *Cardiovascular Research*.  
445           2010;88(1):159–167.
- 446           10. Michailidou, Z, Turban, S, Miller, E, Zou, XT, Schrader, J, Ratcliffe, PJ et al. Increased  
447           Angiogenesis Protects against Adipose Hypoxia and Fibrosis in Metabolic Disease-  
448           resistant 11 $\beta$ -Hydroxysteroid Dehydrogenase Type 1 (HSD1)-deficient Mice. *Journal of*  
449           *Biological Chemistry*. 2012;287(6):4188–4197.
- 450           11. White, CI, Jansen, MA, McGregor, K, Mylonas, KJ, Richardson, RV, Thomson, A et al.  
451           Cardiomyocyte and vascular smooth muscle independent 11 $\beta$ -hydroxysteroid  
452           dehydrogenase 1 amplifies infarct expansion, hypertrophy and the development of heart  
453           failure following myocardial infarction in male mice. *Endocrinology*. 2016;157(1):346-357.
- 454           12. Mylonas, KJ, Turner, NA, Bageghni, SA, Kenyon, CJ, White, CI, McGregor et al. 11 $\beta$ -  
455           HSD1 suppresses cardiac fibroblast CXCL2, CXCL5 and neutrophil recruitment to the

- 456 heart post MI. *The Journal of Endocrinology*. 2017;233(3):315–327.
- 457 13. Davidson, CT, Dover, AR, McVicar, CM, Megaw, R, Glenn, JV, Hadoke, PWF et al.  
458 Inhibition or deletion of 11 $\beta$ -HSD1 does not increase angiogenesis in ischemic  
459 retinopathy. *Diabetes and Metabolism*. 2017;43(5):480-483.
- 460 14. Liu, X, Tan, X, Xia, M, Wu, C, Song, J, Wu, J et al. Loss of 11 $\beta$ HSD1 enhances  
461 glycolysis, facilitates intrahepatic metastasis, and indicates poor prognosis in  
462 hepatocellular carcinoma. *Oncotarget*. 2016;7(2):2038-53.
- 463 15. Verdegem, D, Moens, S, Stapor, P and Carmeliet, P. Endothelial cell metabolism:  
464 parallels and divergences with cancer cell metabolism. *Cancer & Metabolism*. 2014;2;19.
- 465 16. Azher, S, Azami, O, Amato, C, McCullough, M, Celentano, A and Cirillo, N. The Non-  
466 Conventional Effects of Glucocorticoids in Cancer. *Journal of Cellular Physiology*.  
467 2016;231(11):2368–73.
- 468 17. Serrels, A, McLeod, K, Canel, M, Kinnaird, A, Graham, K, Frame, MC et al. The role of  
469 focal adhesion kinase catalytic activity on the proliferation and migration of squamous cell  
470 carcinoma cells'. *International Journal of Cancer*. 2012;131(2):287–297.
- 471 18. McLean GW, Komiyama NH, Serrels B, Asano H, Reynolds L, Conti F et al. Specific  
472 deletion of focal adhesion kinase suppresses tumor formation and blocks malignant  
473 progression. *Genes Dev*. 2004;18:2998–3003.
- 474 19. Hingorani, SR, Wang, L, Multani, AS, Combs, C, Deramaudt, TB, Hruban, RH et al.  
475 Trp53R172H and KrasG12D cooperate to promote chromosomal instability and widely  
476 metastatic pancreatic ductal adenocarcinoma in mice. *Cancer Cell*. 2005;7(5):469-83.
- 477 20. Webster SP, Seckl JR, Walker BR, Ward P, Pallin TD, Dyke HJ et al. 4-phenyl-piperidin-  
478 1-yl)-[5-(1H-pyrazol-4-yl)-thiophen-3-yl]-methanone Compounds and Their Use. *PCT Intl*  
479 *WO2011/033255*. 2011.
- 480 21. Serrels, A, Lund, T, Serrels, B, Byron, A, McPherson, RC, von Kriegsheim, A, et al.  
481 Nuclear FAK controls chemokine transcription, Tregs, and evasion of anti-tumor  
482 immunity. *Cell*. 2015;163(1):160-73.
- 483 22. Hansen, S, Grabau, DA, Sørensen, FB, Bak, M, Vach, W and Rose, C. The prognostic

- 484 value of angiogenesis by Chalkley counting in a confirmatory study design on 836 breast  
485 cancer patients. *Clinical Cancer Research*. 2000;6(1):139-146.
- 486 23. Trapnell, C, Pachter, L, Salzberg, SL. TopHat: discovering splice junctions with RNA-Seq.  
487 *Bioinformatics*. 2009;25(9):1105-1111
- 488 24. Trapnell, C, Roberts, A, Goff, L, Pertea, G, Kim, D, Kelley, DR et al. Differential gene and  
489 transcript expression analysis of RNA-seq experiments with TopHat and Cufflinks. *Nat*  
490 *Protocols*. 2012;7(3):562-78.
- 491 25. Budunova, IV, Carbajal, S, Kang, H, Viaje, A, Slaga, TJ. Altered glucocorticoid receptor  
492 expression and function during mouse skin carcinogenesis, *Molecular Carcinogenesis*.  
493 1997;18(3):177–85.
- 494 26. Spiegelman, VS, Budunova, IV, Carbajal, S, Slaga, TJ. Resistance of transformed mouse  
495 keratinocytes to growth inhibition by glucocorticoids. *Molecular Carcinogenesis*.  
496 1997;20(1):99–107.
- 497 27. Wamil, M, Battle, JH, Turban, S, Kipari, T, Seguret, D, de Sousa Peixoto, R, et al. Novel  
498 Fat Depot-Specific Mechanisms Underlie Resistance to Visceral Obesity and  
499 Inflammation in 11 $\beta$ -Hydroxysteroid Dehydrogenase Type 1-Deficient Mice. *Diabetes*.  
500 2011;60(4):1158–1167.
- 501 28. Luo, MJ, Thieringer, R, Springer, MS, Wright, SD, Hermanowski-Vosatka, A, Plump, A et  
502 al. 11 $\beta$ -HSD1 inhibition reduces atherosclerosis in mice by altering proinflammatory gene  
503 expression in the vasculature. *Physiological Genomics*. 2012;45:47-57.
- 504 29. Kipari, T, Hadoke, PWF, Iqbal, J, Man, TY, Miller, E, Coutinho, AE et al. 11 beta-  
505 hydroxysteroid dehydrogenase type 1 deficiency in bone marrow-derived cells reduces  
506 atherosclerosis. *The FASEB Journal*. 2013;27(4):1519–1531.
- 507 30. Kim, R, Emi, M, Tanabe, K. Cancer immunoediting from immune surveillance to immune  
508 escape, *Immunology*. 2007;121(1):1–14.
- 509 31. Tiganescu, A, Tahrani, AA, Morgan, SA, Otranto, M, Desmoulière, A, Abrahams, L et al.  
510 11 $\beta$ -Hydroxysteroid dehydrogenase blockade prevents age-induced skin structure and  
511 function defects. *Journal of Clinical Investigation*. 2013;123(7):3051–3060.

- 512 32. Terao, M, Murota, H, Kimura, A, Kato, A, Ishikawa, A, Igawa, K et al. 11 $\beta$ -Hydroxysteroid  
513 Dehydrogenase-1 Is a Novel Regulator of Skin Homeostasis and a Candidate Target for  
514 Promoting Tissue Repair. PLoS ONE. 2011;6(9):e25039.
- 515 33. Terao, M, Tani, M, Itoi, S, Yoshimura, T, Hamasaki, T, Murota, H et al. 11 $\beta$ -  
516 hydroxysteroid dehydrogenase 1 specific inhibitor increased dermal collagen content and  
517 promotes fibroblast proliferation. PloS ONE. 2014;9(3):e93051.
- 518 34. Itoi, S, Terao, M, Murota, H, Katayama, I. 11 $\beta$ -Hydroxysteroid dehydrogenase 1  
519 contributes to the pro-inflammatory response of keratinocytes. Biochemical and  
520 Biophysical Research Communications. 2013;440(2):265–270.
- 521 35. Kuo, T, McQueen, A, Chen TC, Wang, JC. Regulation of Glucose Homeostasis by  
522 Glucocorticoids. In: Wang JC, Harris C, eds. Glucocorticoid Signaling. Advances in  
523 Experimental Medicine and Biology, vol 872. New York: Springer;2015:99-126.
- 524 36. McGregor, K, Mylonas, KJ, White, C, Walker, BR and Gray, G. 216 Immediate  
525 Pharmacological Inhibition of Local Glucocorticoid Generation increases Angiogenesis  
526 and Improves Cardiac Function after Myocardial Infarction. Heart. 2014;100 Suppl: A118.
- 527 37. Chung, AS, Ferrara, N. Developmental and Pathological Angiogenesis. Annual Review of  
528 Cell and Developmental Biology. 2011;27(1):563–584.
- 529 38. Chapman, KE, Coutinho, AE, Zhang, Z, Kipari, T, Savill, JS and Seckl, JR. Changing  
530 glucocorticoid action: 11 $\beta$ -hydroxysteroid dehydrogenase type 1 in acute and chronic  
531 inflammation. The Journal of Steroid Biochemistry and Molecular Biology.  
532 2013;137(100):82–92.
- 533 39. Coutinho, AE, Gray, M, Brownstein, DG, Salter, DM, Sawatzky, DA, Clay, S et al. 11 $\beta$ -  
534 Hydroxysteroid dehydrogenase type 1, but not type 2, deficiency worsens acute  
535 inflammation and experimental arthritis in mice. Endocrinology. 2012;153(1):234–40.
- 536 40. Coutinho, AE, Kipari, TMJ, Zhang, Z, Esteves, CL, Lucas, CD, Gilmour, JS et al. 11 $\beta$ -  
537 Hydroxysteroid Dehydrogenase type 1 is expressed in neutrophils and restrains an  
538 inflammatory response in male mice. Endocrinology. 2016;157(7):2928-36.
- 539 41. Harper, J, Sainson, RCA. Regulation of the anti-tumour immune response by cancer-

- 540 associated fibroblasts. *Seminars in Cancer Biology*. 2014;25:69–77.
- 541 42. Fang, MM, Yuan, J, Peng, C, Li, Y. Collagen as a double-edged sword in tumor  
542 progression. *Tumor Biology*. 2014;35:2871-2882.
- 543 43. Özdemir, BC, Pentcheva-Hoang, T, Carstens, JL, Zheng, X, Wu, CC, Simpson, TR et al.  
544 Depletion of Carcinoma-Associated Fibroblasts and Fibrosis Induces Immunosuppression  
545 and Accelerates Pancreas Cancer with Reduced Survival. *Cancer Cell*. 2014;25(6):719–  
546 734.
- 547 44. Coussens, LM, Raymond, WW, Bergers, G, Laig-Webster, M, Behrendtsen, O, Werb, Z  
548 et al. Inflammatory mast cells up-regulate angiogenesis during squamous epithelial  
549 carcinogenesis. *Genes & Development*. 1999;13(11):1382–97.
- 550 45. Willhauck, MJ, Mirancea, N, Vosseler, S, Pavesio, A, Boukamp, P, Mueller, MM et al.  
551 Reversion of tumor phenotype in surface transplants of skin SCC cells by scaffold-  
552 induced stroma modulation. *Carcinogenesis*. 2006;28(3):595–610.
- 553 46. Cretu, A, Brooks, PC. Impact of the non-cellular tumor microenvironment on metastasis:  
554 Potential therapeutic and imaging opportunities. *Journal of Cellular Physiology*.  
555 2007;213(2):391–402.
- 556 47. Baba, Y, Iyama, KI, Ikeda, K, Ishikawa, S, Hayashi, N, Miyanari, N et al. The Expression  
557 of Type IV Collagen  $\alpha 6$  Chain Is Related to the Prognosis in Patients with Esophageal  
558 Squamous Cell Carcinoma. *Annals of Surgical Oncology*. 2008;15(2):555-565.
- 559 48. Erez, N, Truitt, M, Olson, P, Hanahan, D, Hanahan, D. Cancer-Associated Fibroblasts  
560 Are Activated in Incipient Neoplasia to Orchestrate Tumor-Promoting Inflammation in an  
561 NF- $\kappa$ B-Dependent Manner. *Cancer Cell*. 2010;17(2):135–147.
- 562 49. Zhang, L, Dong, Y, Zou, F, Wu, M, Fan, C & Ding, Y. 11 $\beta$ -Hydroxysteroid dehydrogenase  
563 1 inhibition attenuates collagen-induced arthritis. *International Immunopharmacology*.  
564 2013;17(3):489-94.
- 565 50. Hardy, RS, Seibel, MJ, Cooper, MS. Targeting 11 $\beta$ -hydroxysteroid dehydrogenases: a  
566 novel approach to manipulating local glucocorticoid levels with implications for rheumatic  
567 disease, *Current Opinion in Pharmacology*. 2013;13(3):440-4.

- 568 51. Cerami, E, Gao, J, Dogrusoz, U, Gross, BE, Sumer, SO, Aksoy, BA et al. The cBio  
569 cancer genomics portal: an open platform for exploring multidimensional cancer  
570 genomics data. *Cancer Discovery*, 2012;2(5):401-404.
- 571 52. Mitić, T, Shave, S, Semjonous, N, McNae, I, Cobice, DF, Lavery, GG et al. 11 $\beta$ -  
572 Hydroxysteroid dehydrogenase type 1 contributes to the balance between 7-keto- and 7-  
573 hydroxy-oxysterols in vivo. *Biochemical Pharmacology*, 2013;86(1):146-153.



575 **Figure Legends**

576

577 **Figure 1 - SCC tumours show greater 11 $\beta$ -HSD1 activity and express more GR than PDAC**

578 **tumours.** A) SCC tumours had greater 11 $\beta$ -HSD1 dehydrogenase activity than PDAC tumours.

579 \*\*\* P<0.001. N=6/group. B) GR transcript levels were greater in SCC tumours than PDAC

580 tumours. N=5-6/group. \* P<0.05. Data were compared by independent sample t-test.

581

582

583 **Figure 2 – The 11 $\beta$ -HSD1 inhibitor UE2316 enhances SCC but not PDAC tumour growth.** A)

584 UE2316 enhanced tumour growth from day 4 onwards in mice injected with SCC cells.

585 N=9/group. B) UE2316 did not affect PDAC tumour growth in mice injected with Panc043 cells.

586 N=6/group. C) Neither tumour cell injection (day 5) nor UE2316 diet introduction affected mouse

587 weight. N=6-9/group. \*\* P<0.01. Data were compared by 2-Way ANOVA. D) The proportion of

588 cells staining positive for proliferation marker Ki67 showed a trend towards being reduced

589 (P=0.07) in tumours from UE2316-treated mice but this did not reach significance. N=6/group.

590 Data were compared by independent samples t-test. Representative images of hotspots from

591 Ki67-stained squamous cell carcinoma (SCC) tumours from control (E) and UE2316 treated (F)

592 mice are shown. Hotspots were typically near the periphery of the tumour. Scale bar = 50 $\mu$ m.

593

594

595 **Figure 3 - UE2316 does not affect angiogenesis in tumours.** A) Tumour tissue from SCC

596 tumours; endothelial cells are stained green (CD31 visualised with Alexa-Fluor 488), smooth

597 muscle cells are stained red ( $\alpha$ -SMA visualised with Cy3) and nuclei are stained blue (DAPI).

598 Tumours had densely packed nuclei. 200x magnification. Scale bar 50 $\mu$ m. B) CD31 was also

599 visualised with diaminobenzidine (DAB) for counts. 200x magnification. Scale bar 50 $\mu$ m. C)

600 UE2316 did not affect vessel density in either SCC or PDAC tumours. D) UE2316 did not affect

601 the proportion of vessels lacking smooth muscle coverage in SCC tumours (i.e. CD31 positive but

602  $\alpha$ -SMA negative). (E) UE2316 did not affect Chalkely counts in SCC tumours. 1 section/tumour,

603 N=5-6 animals/group. F) mRNA levels for *Vegfa* and *Vegfr2* in SCC tumours were unaffected by  
604 UE2316. Data were compared by independent samples t-test for panels C/D, Mann-Whitney U  
605 test for Panel E.

606

607

608 **Figure 4 – Neither corticosterone nor UE2316 affect SCC cell growth or viability *in vitro*.**

609 The confluence of SCC cells imaged over 72 hours using the Incucyte was unaffected by  
610 exposure to either corticosterone (CORT, panel A) or the 11 $\beta$ -HSD1 inhibitor UE2316 (panel B).  
611 300nM STS was included in all experiments as a positive cytotoxic control. N=5 (technical  
612 repeats, treatments in sextuplet). SCC viability, as determined by the alamarBlue assay, was  
613 unaffected by the addition of corticosterone (panel C) or the 11 $\beta$ -HSD1 inhibitor UE2316 (panel  
614 D). AU = Arbitrary units. N=4 (technical repeats, treatments in sextuplet). Data were compared by  
615 one-way ANOVA.

616

617

618 **Figure 5 - F4/80 and CD3 positive cell number in SCC tumours were unaffected by UE2316.**

619 Representative images of squamous cell carcinoma (SCC) tumours from control (A) and UE2316-  
620 treated (B) mice are shown, with DAB immunoreactivity to anti-F4/80 antibody shown in brown  
621 and haematoxylin-counterstained nuclei in blue. C) Immunostaining did not reveal a difference in  
622 F4/80-positive stain area between tumour from control and UE2316-treated mice (P=0.17). N=5-  
623 6/group. Data were compared by independent samples t-test. Scale bar = 50 $\mu$ m. Immunostaining  
624 found no difference in CD3-positive stain area between SCC tumours from control and UE2316-  
625 treated mice, assessed by whole section analysis. N=5/group (D). Representative images of CD3  
626 labelled SCC tumour sections from control (E) and UE2316-treated (F) squamous cell carcinoma  
627 (SCC). DAB immunoreactivity shown in brown and haematoxylin-counterstained nuclei in blue.  
628 Data were compared by independent samples t-test, N=5/group.

629

630

631 **Figure 6 - Type I collagen is reduced in SCC tumours from UE2316-treated mice.** Second  
632 Harmonic Generation imaging showed type I collagen (white signal) in SCC tumours from  
633 UE2316-treated (B) and control mice (A). Scale bar = 100µm. C) Type I collagen was reduced in  
634 tumours from UE2316-treated mice. \*\*\*  $P < 0.001$ . N=5/group. D) *Col1a1* mRNA was reduced in  
635 SCC tumours from UE2316-treated mice compared to control mice. AU = Arbitrary units. \*\*  
636  $P < 0.01$ . N=5-6/group. Data were compared by independent samples t-test.

637

638

639 **Figure 7 – UE2316 affects inflammatory and immune response genes in SCC tumours;**  
640 **analysed using Gene Ontology analysis.** Differentially-expressed genes identified by RNA-  
641 sequencing were defined as being related to the inflammatory response (A) or immune response  
642 (B) by Gene Ontology analysis. N=4-5/group. A modified Fisher Exact test was used to determine  
643 whether the proportion of genes in a given list was significantly associated with a biological  
644 process compared to the murine genome:  $P < 0.05$  for all the above. Data represent mean values  
645 with black bars representing genes that are down-regulated in the UE2316-treated tumours and  
646 open bars those that are up-regulated.

647

648

649

650

**A**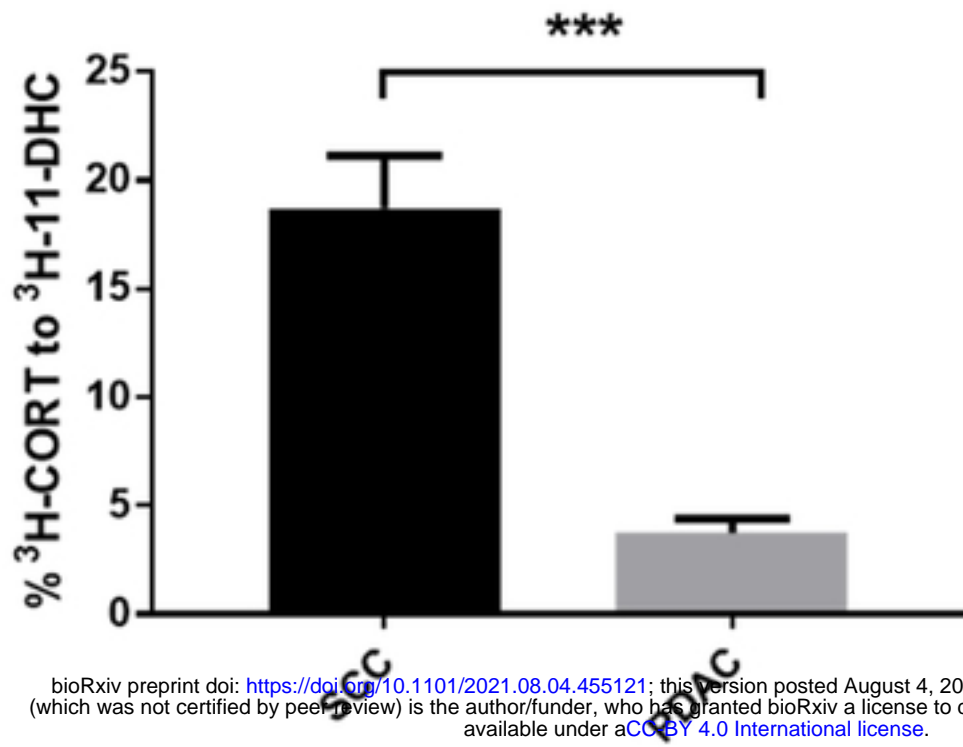**B**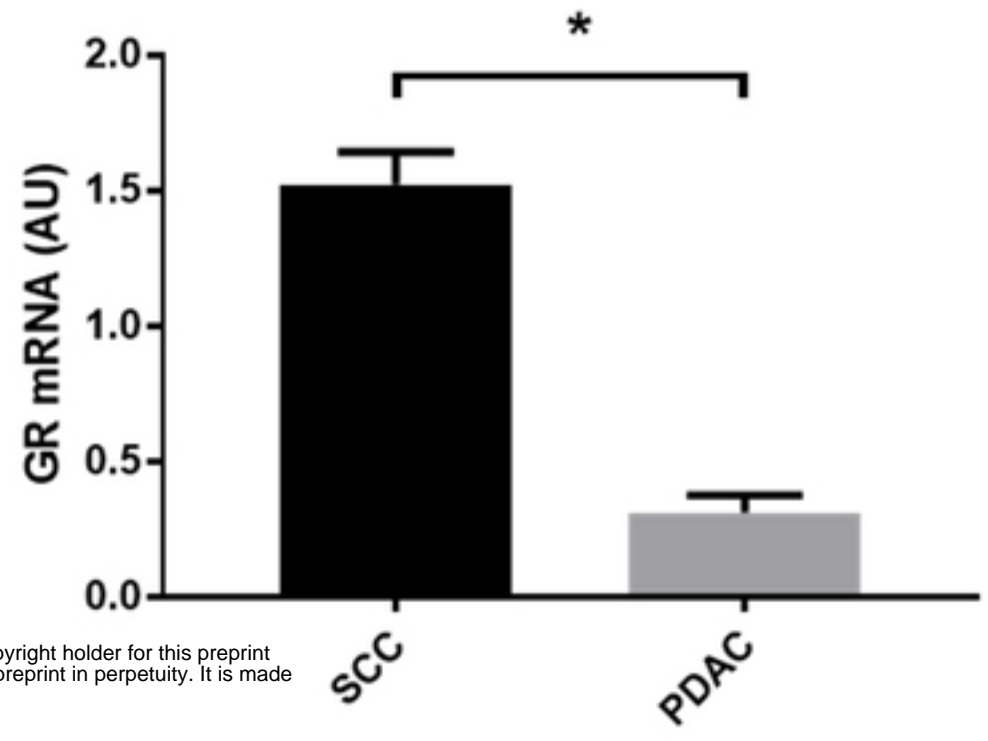

bioRxiv preprint doi: <https://doi.org/10.1101/2021.08.04.455121>; this version posted August 4, 2021. The copyright holder for this preprint (which was not certified by peer review) is the author/funder, who has granted bioRxiv a license to display the preprint in perpetuity. It is made available under aCC-BY 4.0 International license.

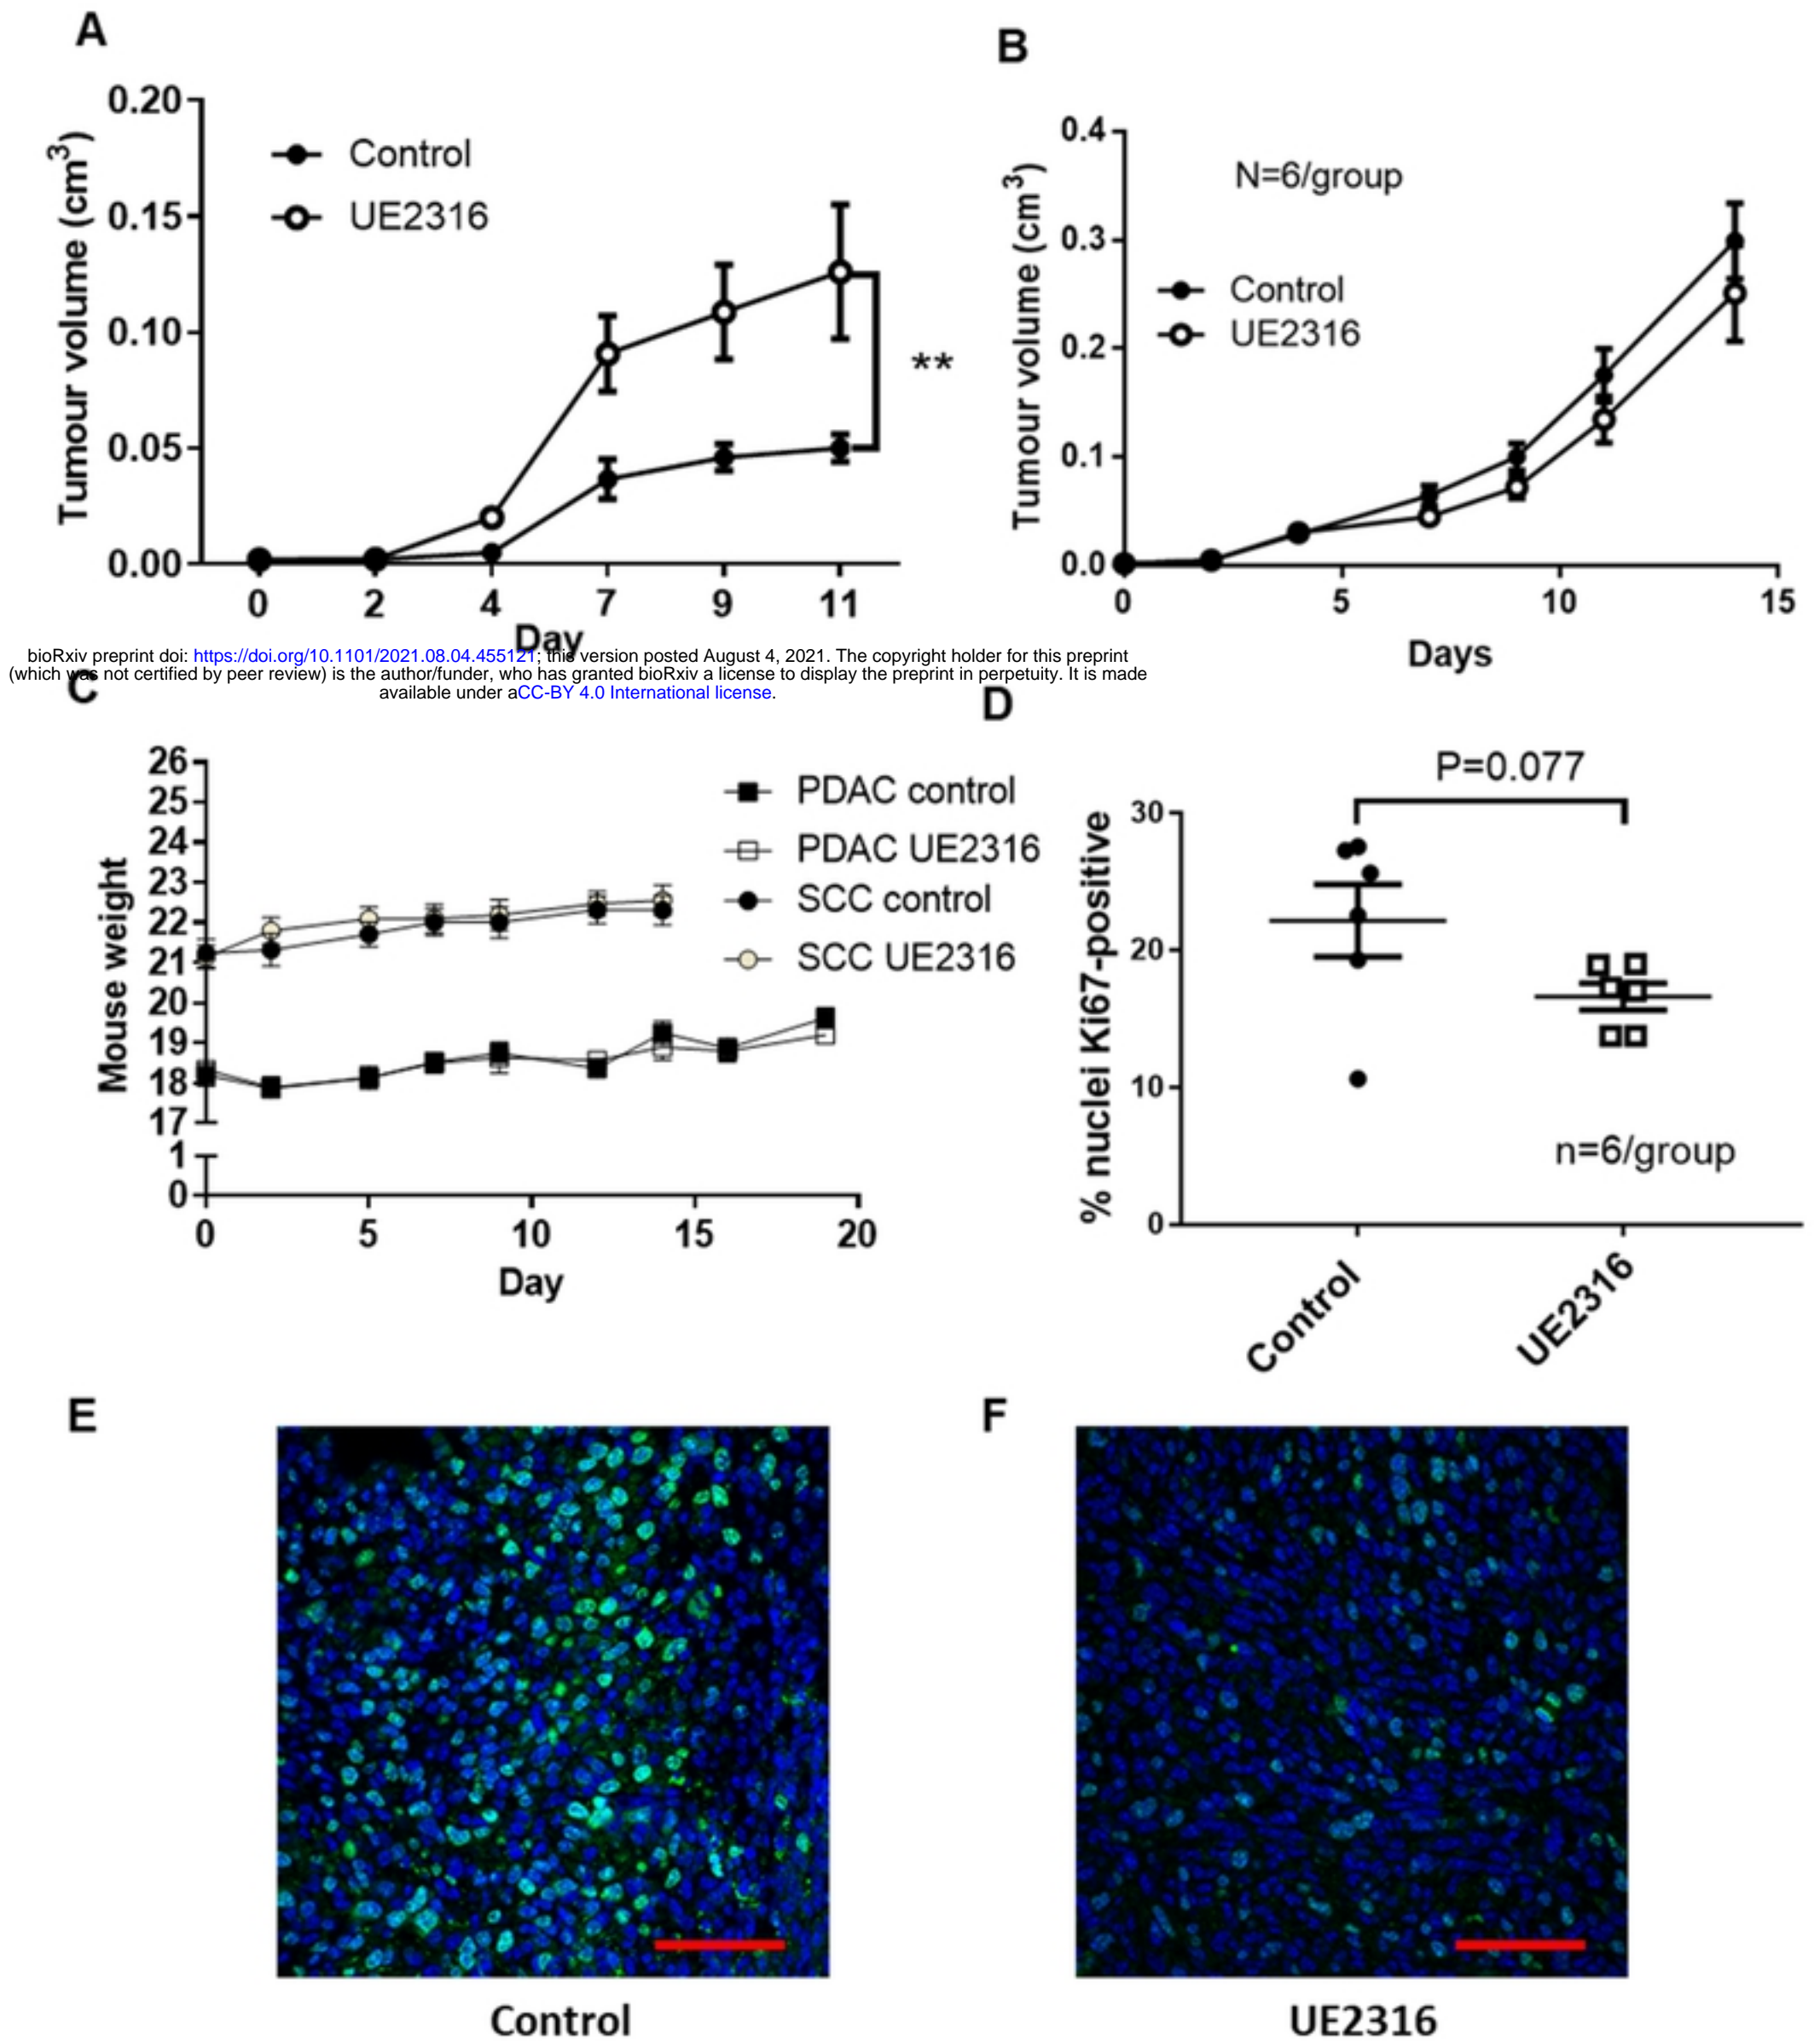

bioRxiv preprint doi: <https://doi.org/10.1101/2021.08.04.455121>; this version posted August 4, 2021. The copyright holder for this preprint (which was not certified by peer review) is the author/funder, who has granted bioRxiv a license to display the preprint in perpetuity. It is made available under aCC-BY 4.0 International license.

Figure 2

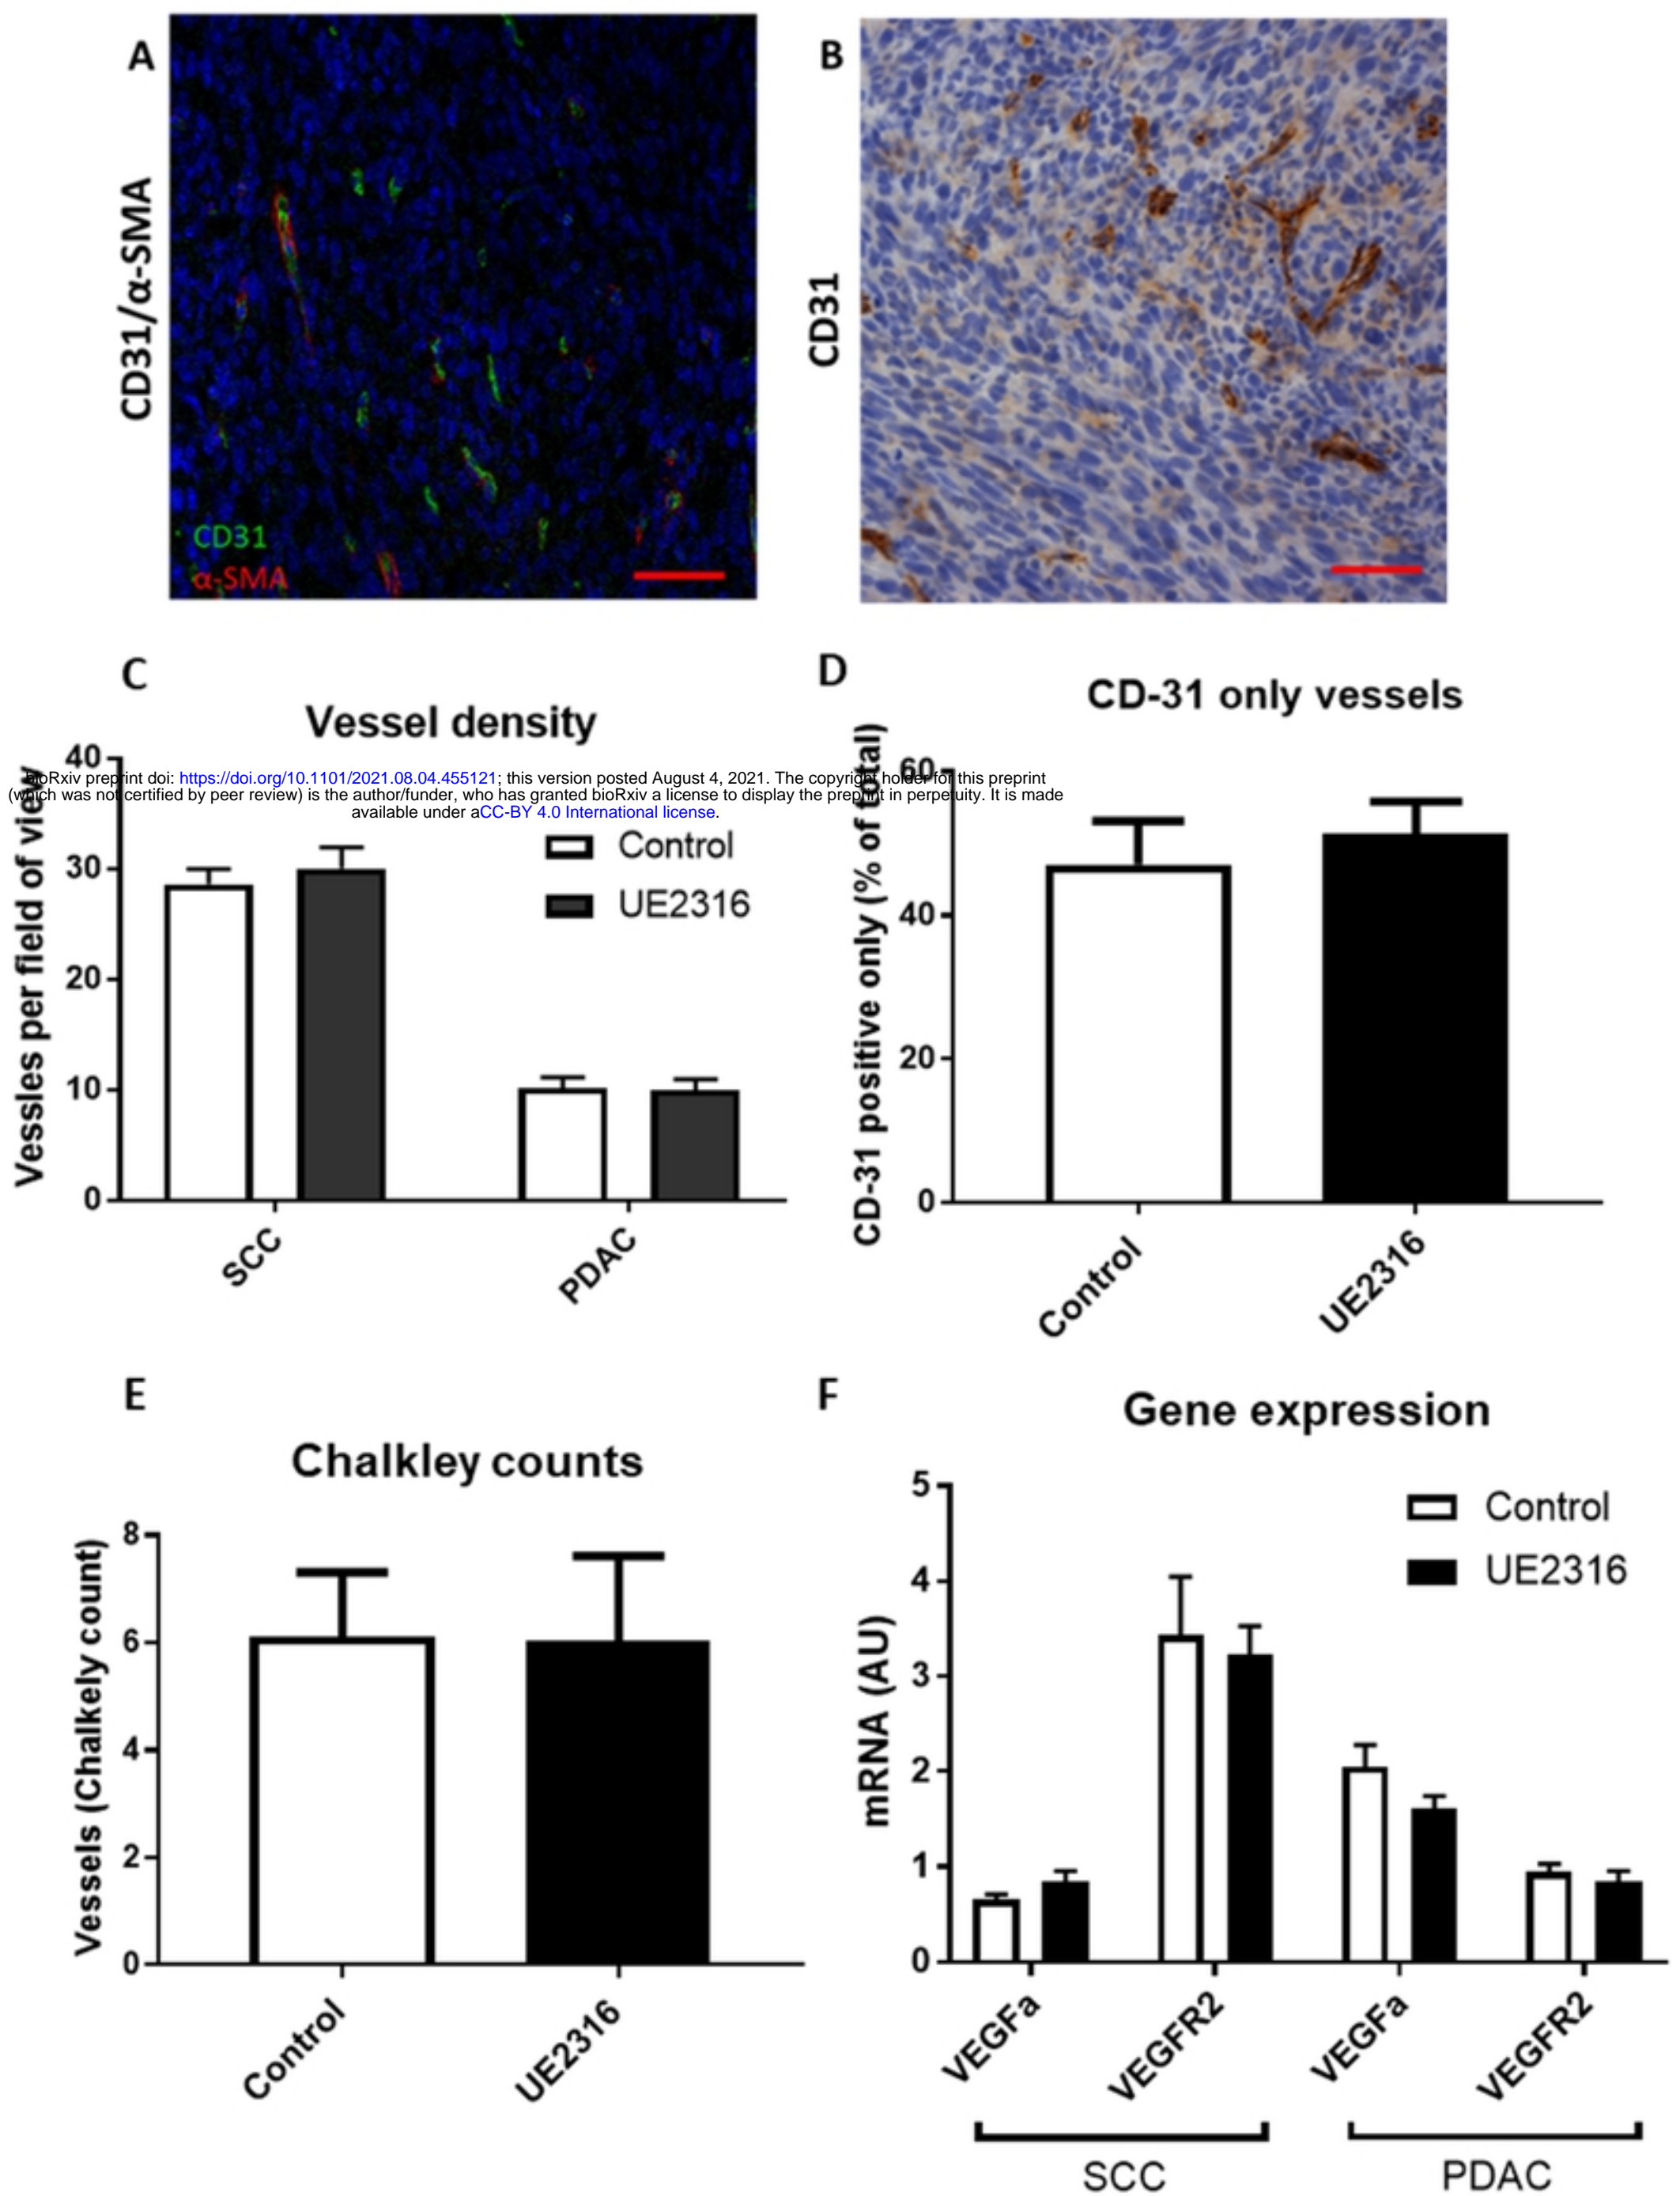

Figure 3

A

B

C

D

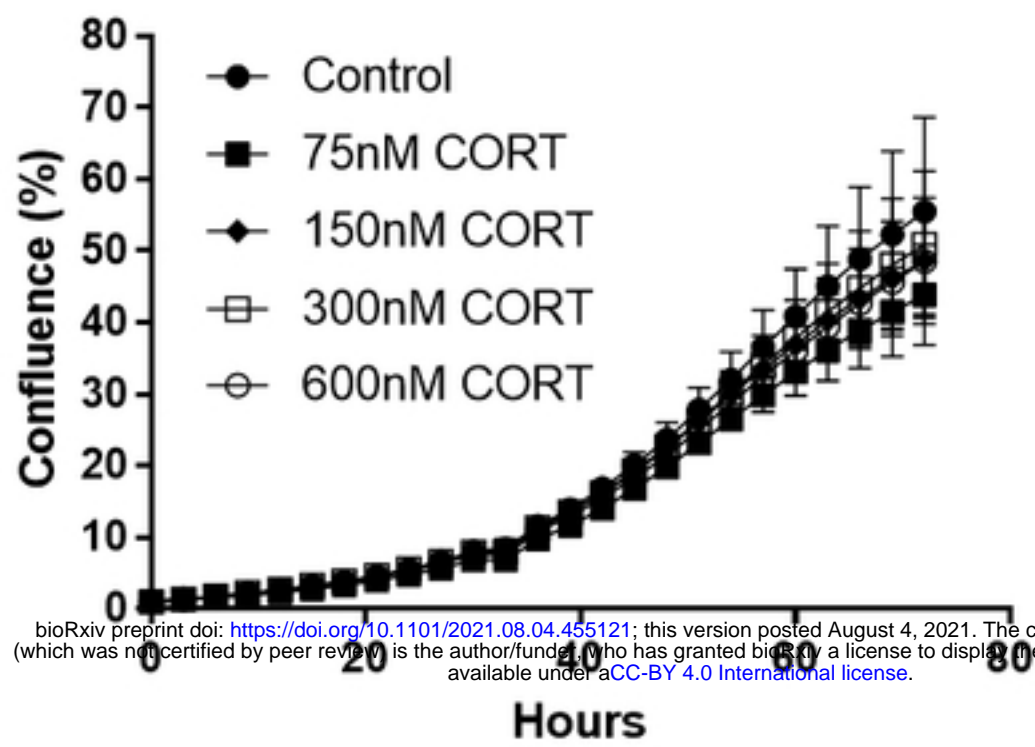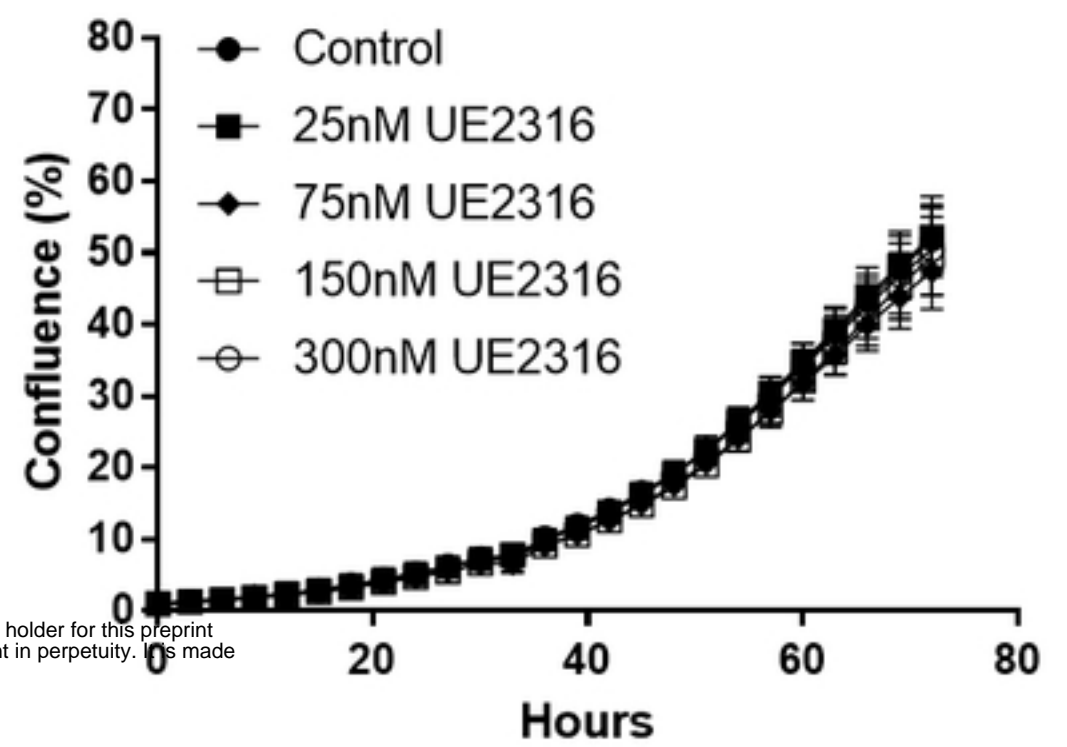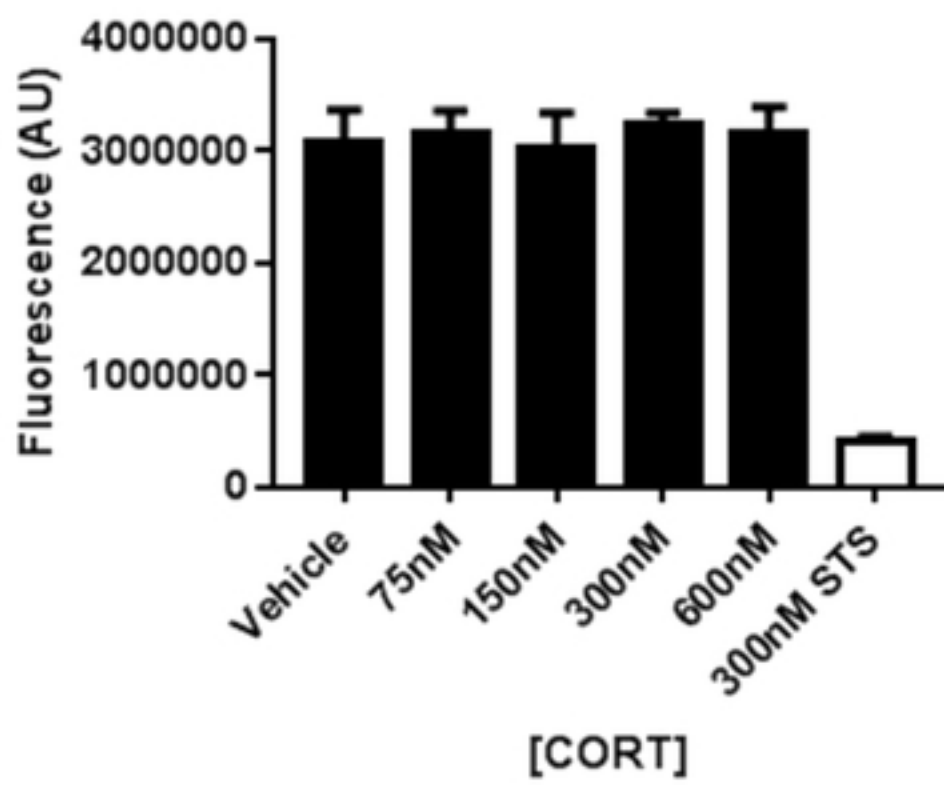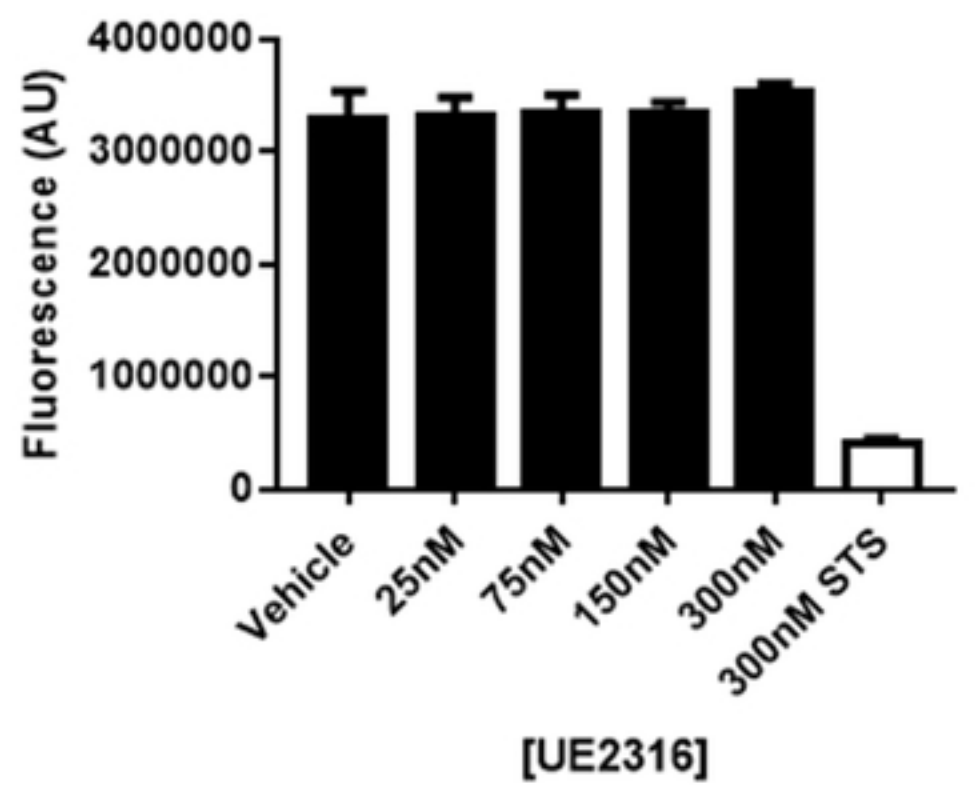

Figure 4

A

B

C

D Control

UE2316

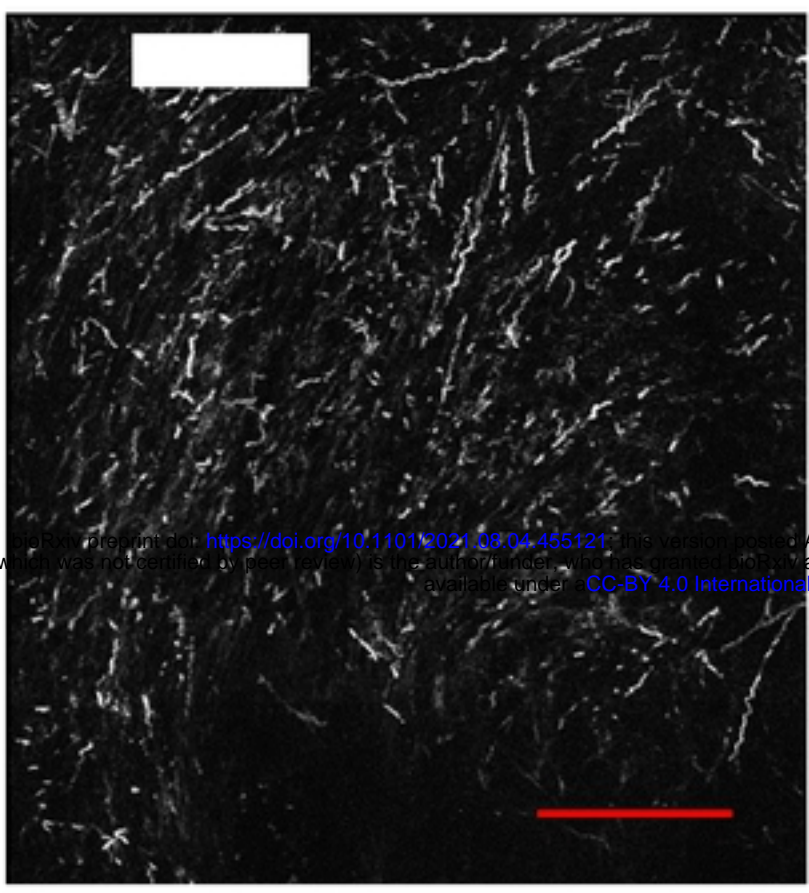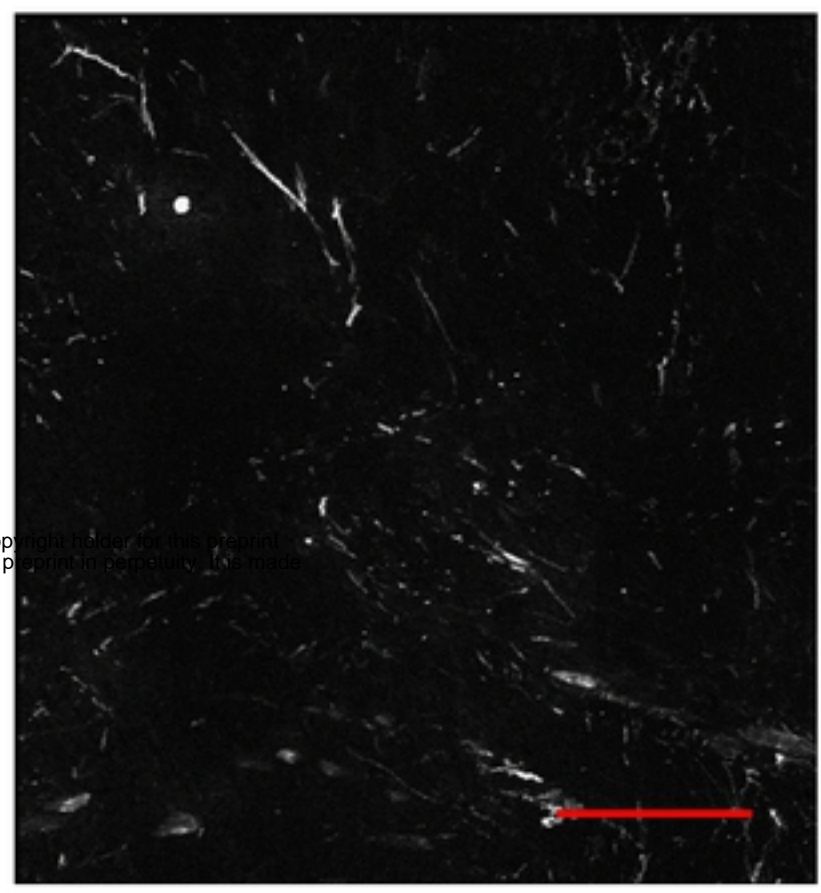

bioRxiv preprint doi: <https://doi.org/10.1101/2021.08.04.455121>; this version posted August 4, 2021. The copyright holder for this preprint (which was not certified by peer review) is the author/funder, who has granted bioRxiv a license to display the preprint in perpetuity. It is made available under aCC-BY 4.0 International license.

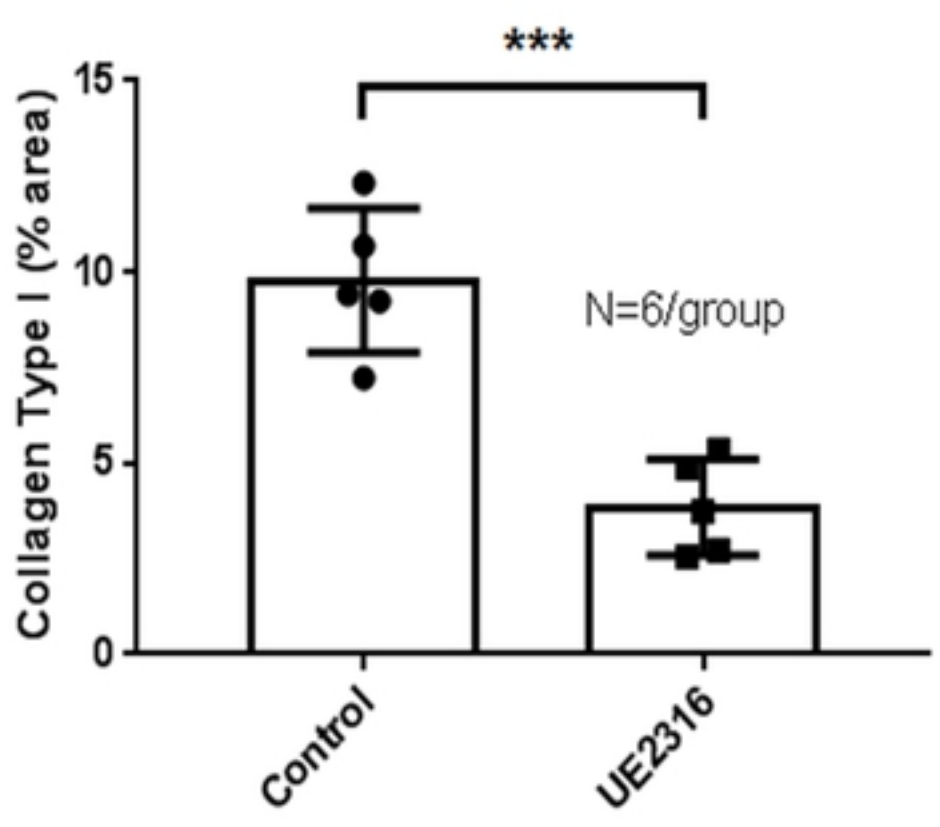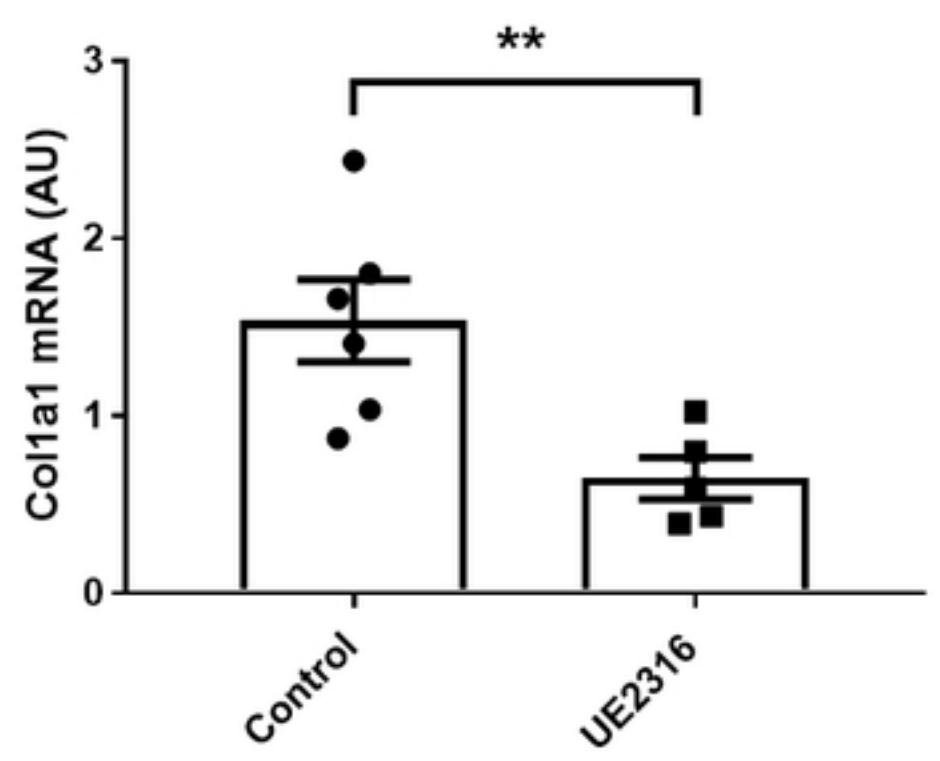

Figure 5



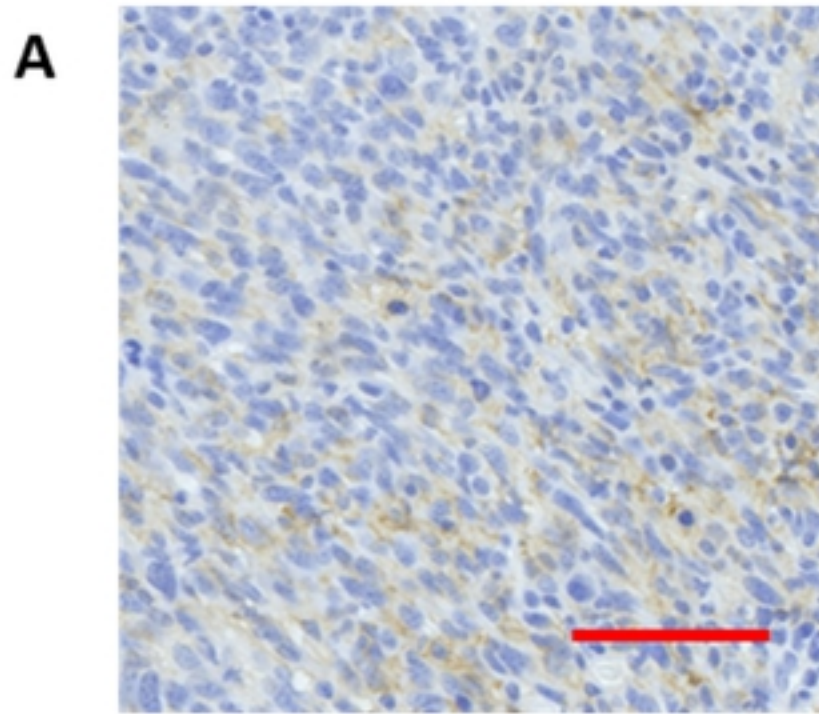

**Control**

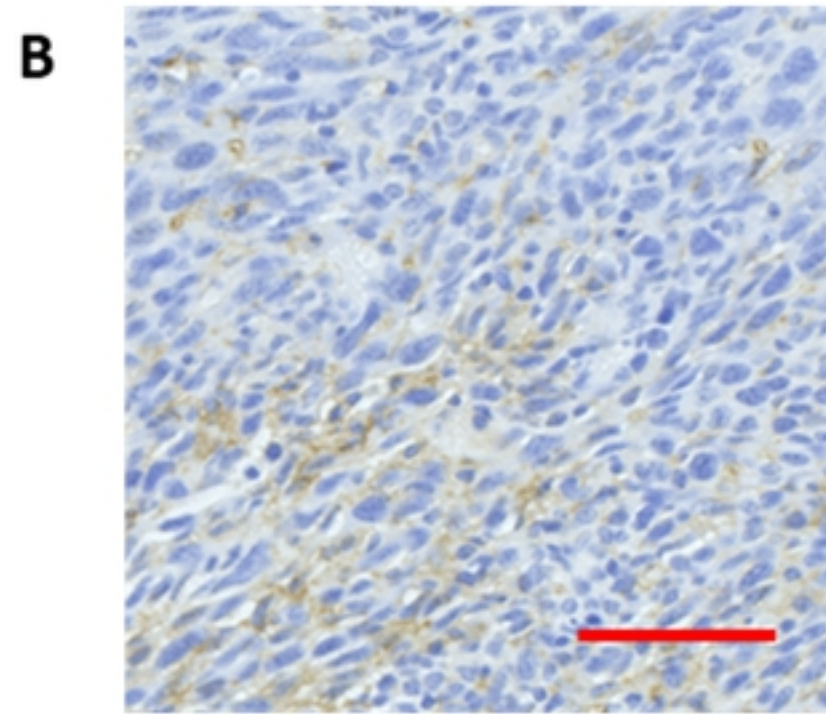

**UE2316**

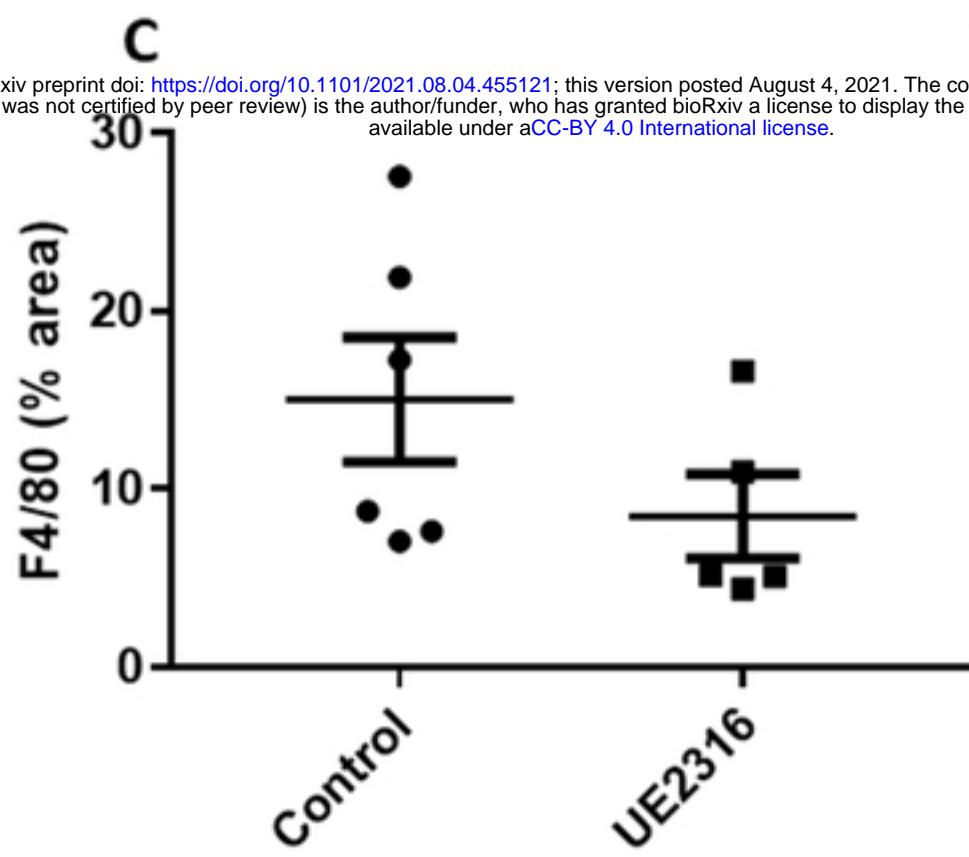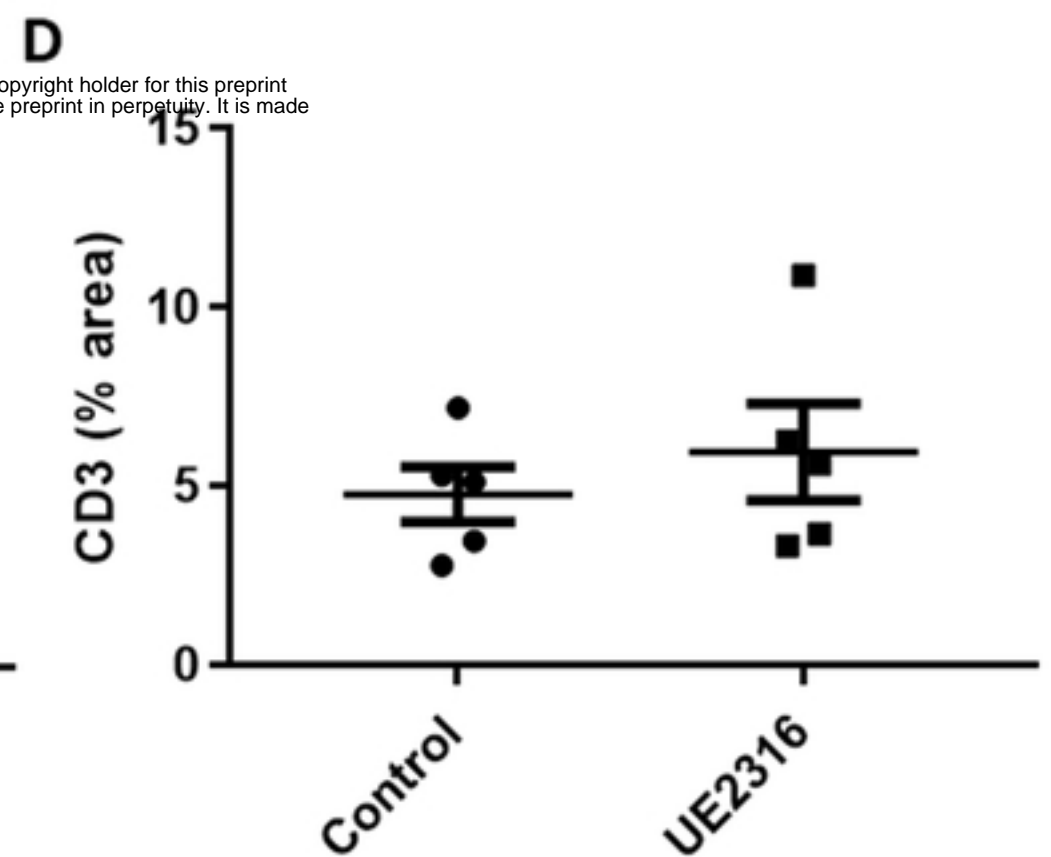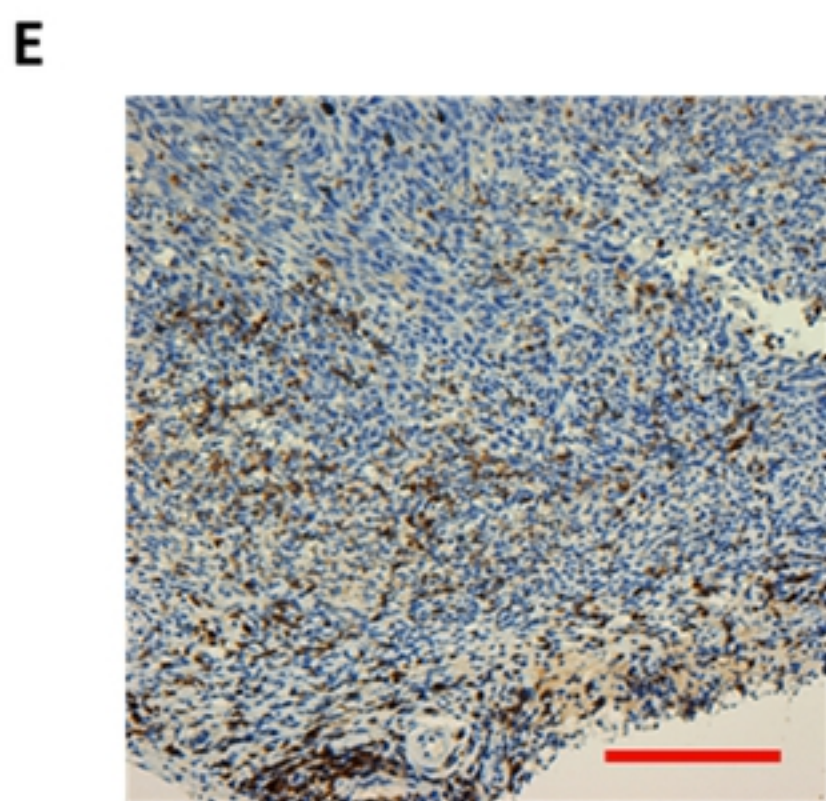

**Control**

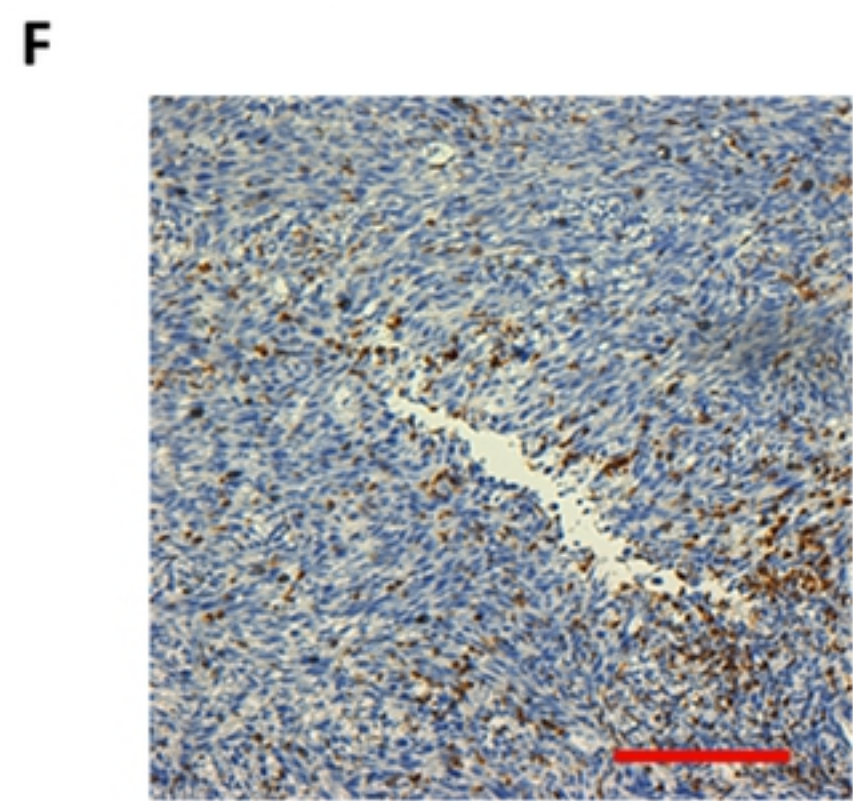

**UE2316**

Figure 6

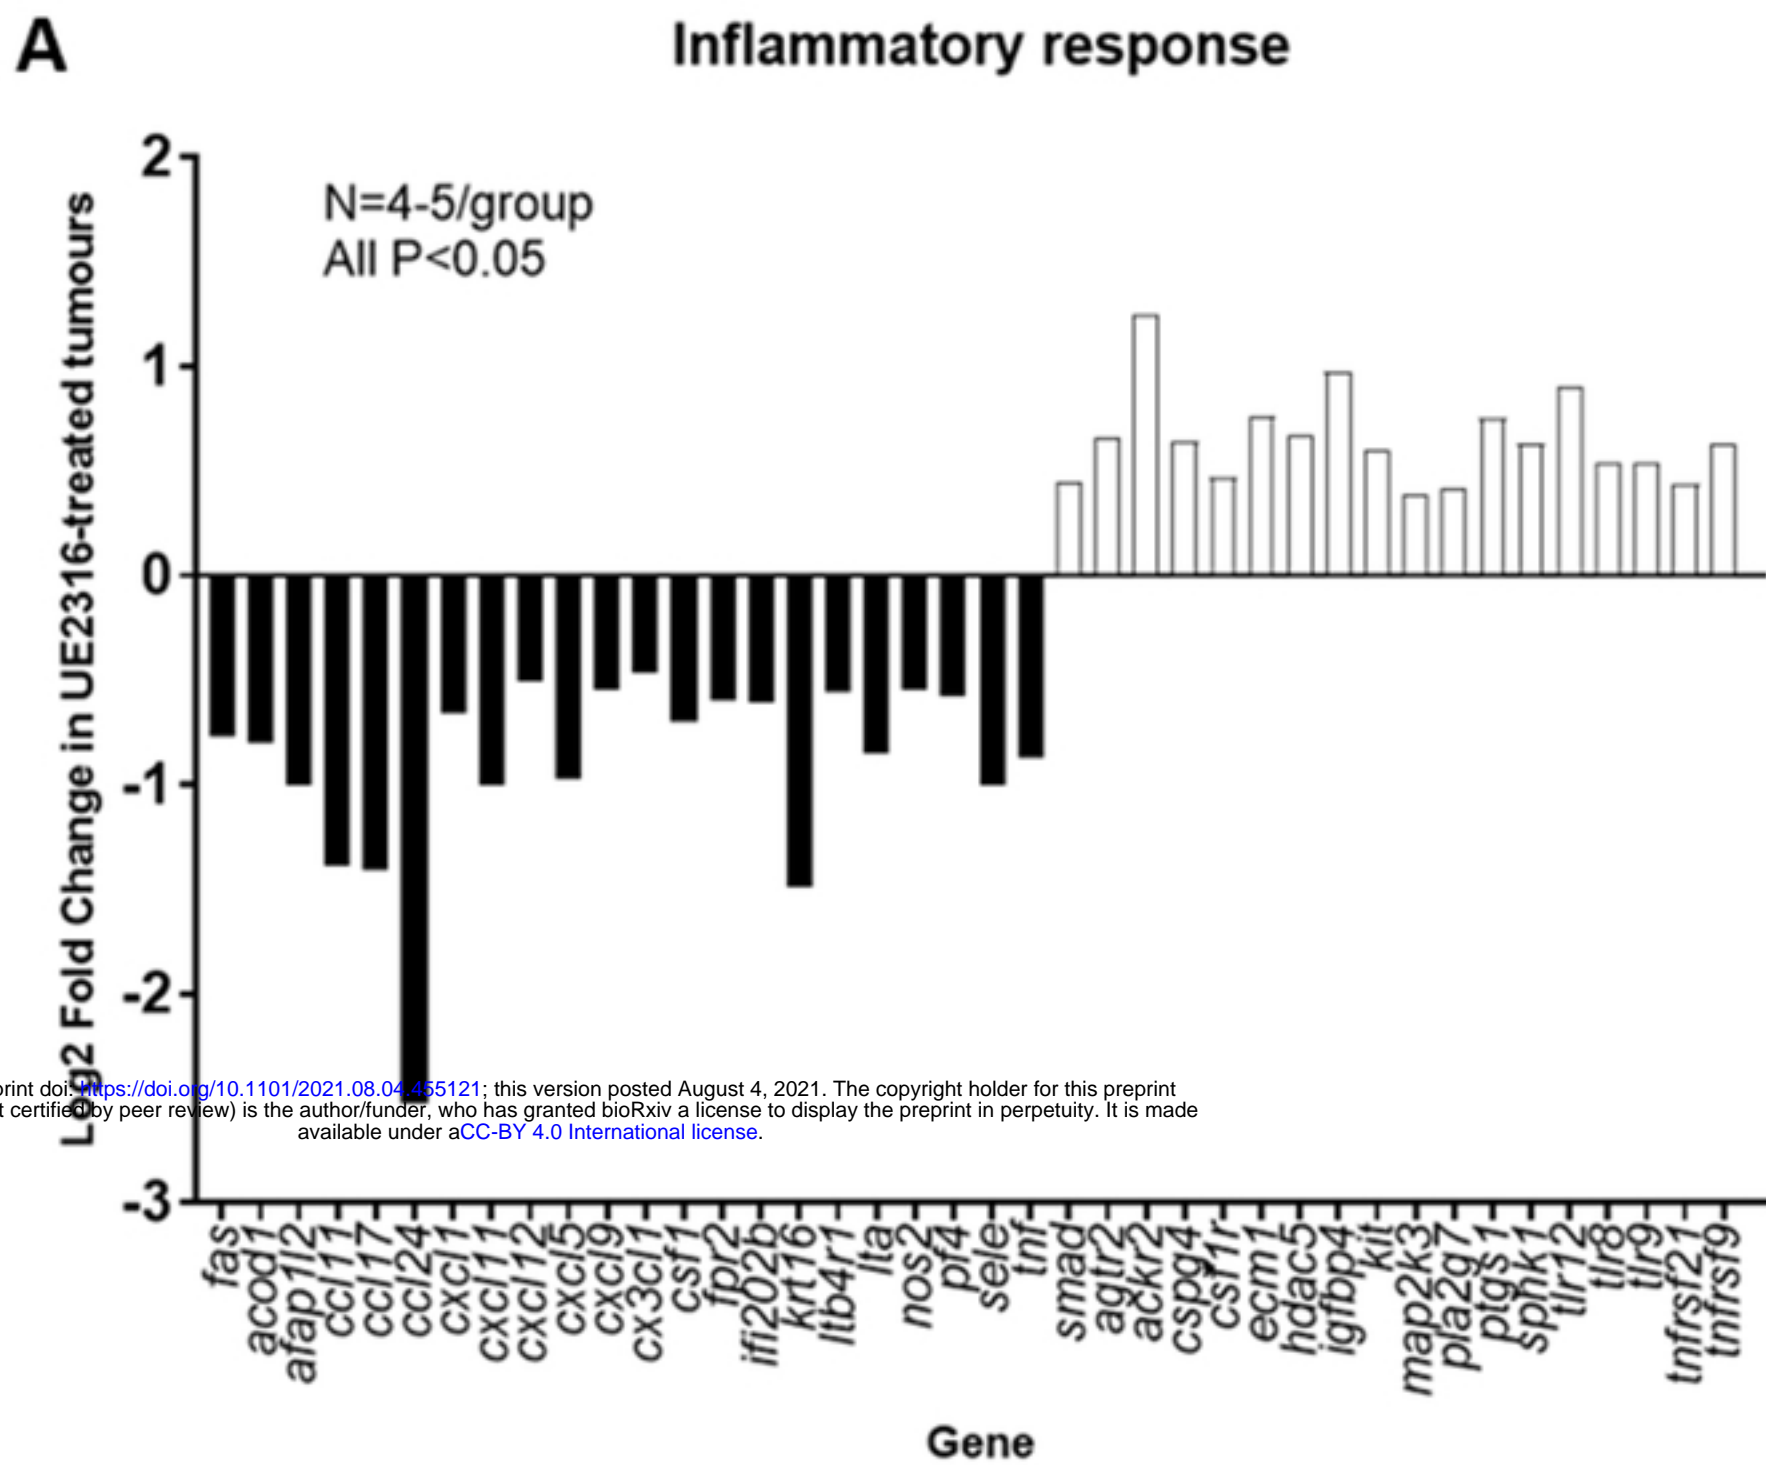

bioRxiv preprint doi: <https://doi.org/10.1101/2021.08.04.455121>; this version posted August 4, 2021. The copyright holder for this preprint (which was not certified by peer review) is the author/funder, who has granted bioRxiv a license to display the preprint in perpetuity. It is made available under aCC-BY 4.0 International license.

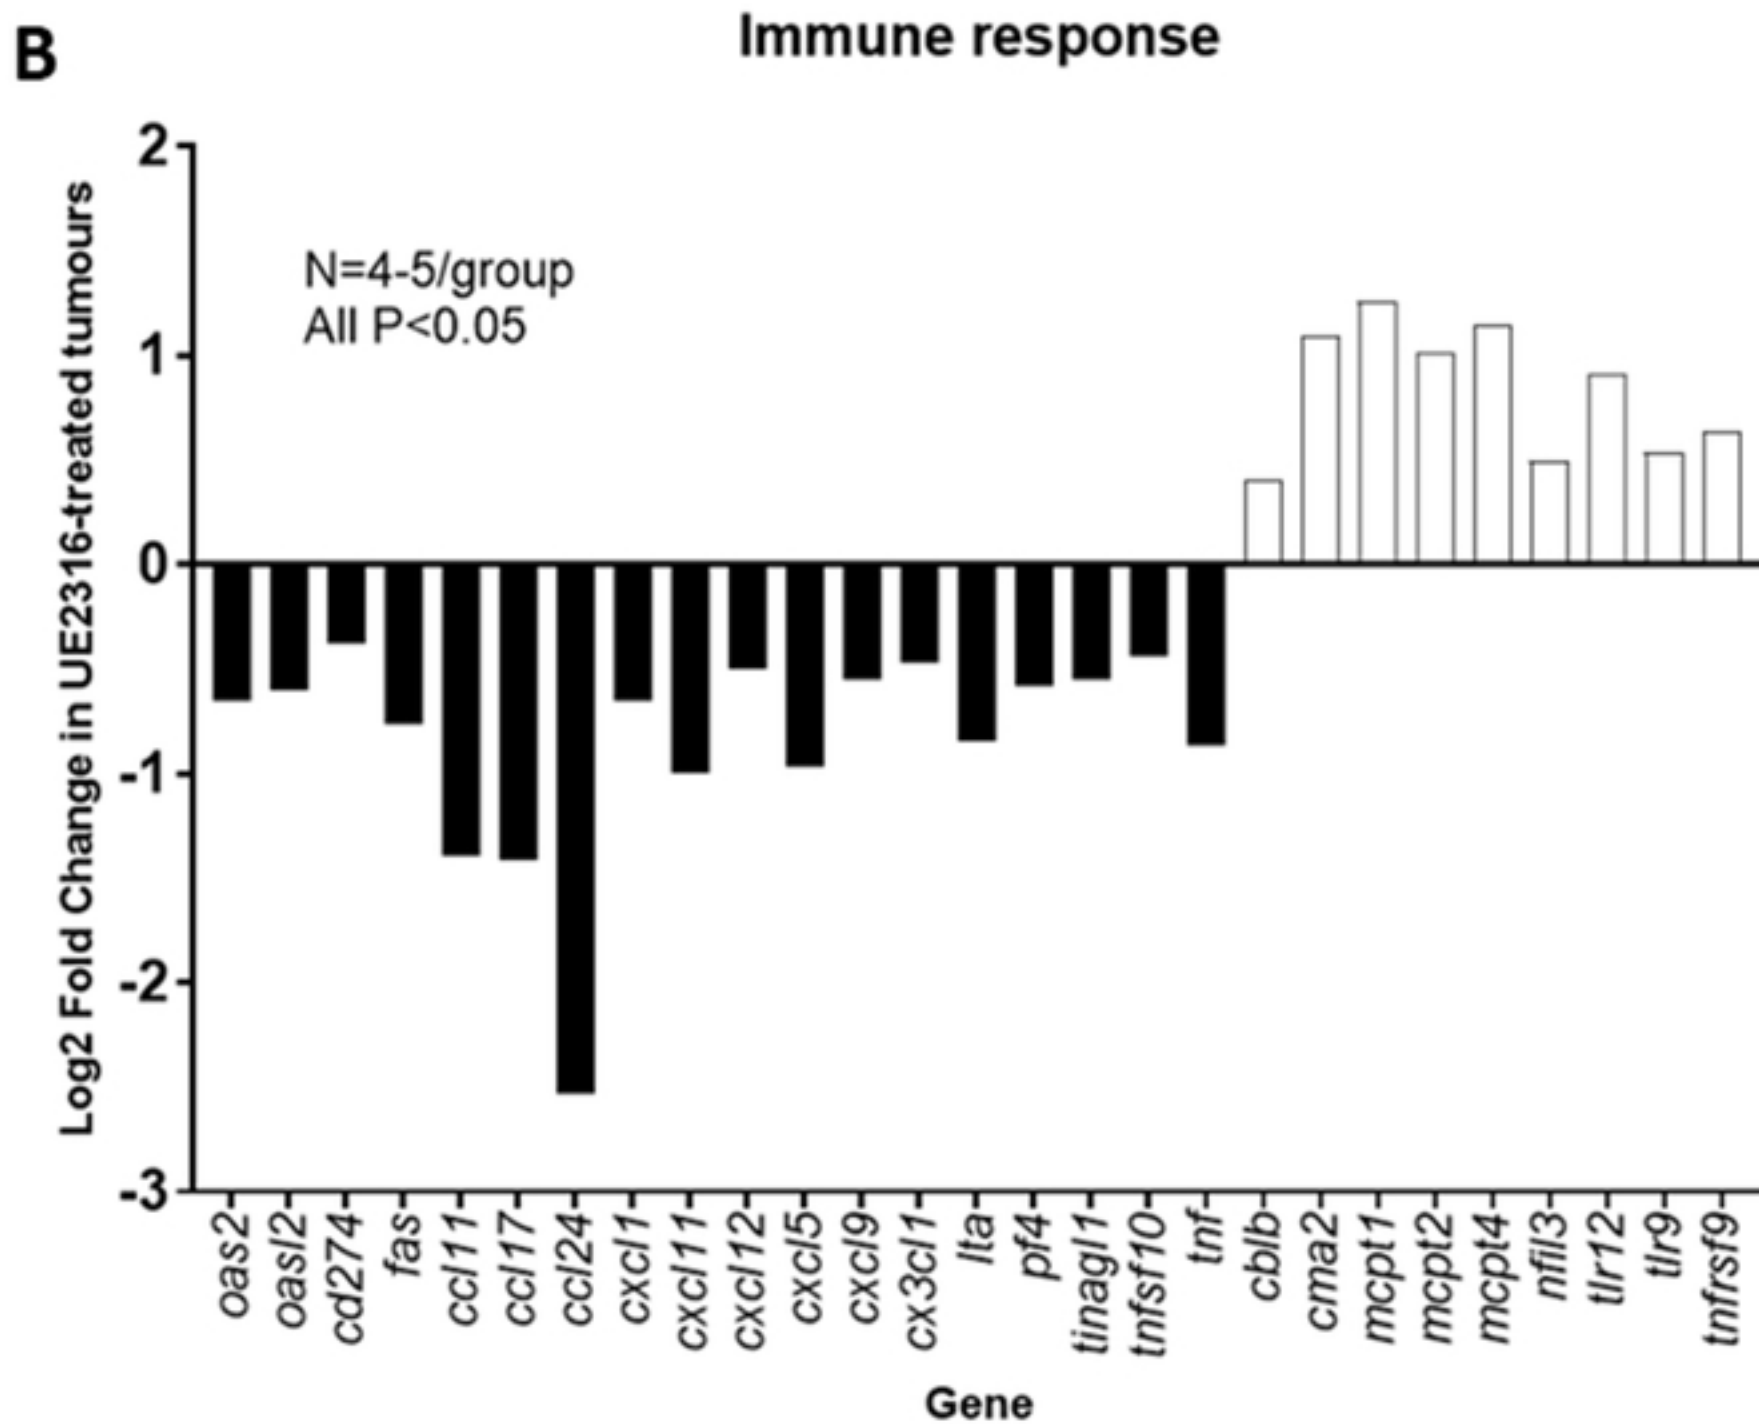

Figure 7
